# Supplementary material
Source: PubMed Central journal article supplement (PMC4478945)
Supplement: jn.114.206599_nutrition206599SupplementaryData1.pdf [file jn.114.206599_nutrition206599SupplementaryData1.pdf]

**Supplemental Table 1** Biomarker Specific Characteristics**Serum Folate: General Characteristics**

|                                                                         |                                                                                                                                                                                                                                                                                                                                                                                                                                                                                                                                                                                                                                                                                                                                                                                                                                                                                                                                             |
|-------------------------------------------------------------------------|---------------------------------------------------------------------------------------------------------------------------------------------------------------------------------------------------------------------------------------------------------------------------------------------------------------------------------------------------------------------------------------------------------------------------------------------------------------------------------------------------------------------------------------------------------------------------------------------------------------------------------------------------------------------------------------------------------------------------------------------------------------------------------------------------------------------------------------------------------------------------------------------------------------------------------------------|
| <p>Humans versus animal models versus cell/molecular studies?</p>       | <p>Model systems, including animals and cell cultures, are often used for preclinical and mechanistic studies of biological systems. For folate biomarker research, they can be used effectively to model gene-nutrient interactions, discover new folate-dependent enzymes and genes, understand metabolic pathways, investigate the responsiveness of biomarkers to dietary challenges and identify genes involved in folate-responsive NTDs (1).</p> <p>No model system faithfully recapitulates human physiology. Although the pathways in one-carbon metabolism are highly conserved between mice and humans, the regulation of the pathways can differ substantially (2). Serum/plasma folate concentrations are about 10-fold higher in mice than in humans (3). The limitations inherent with the model system must be understood and accounted for in the experimental design and interpretation of results.</p>                   |
| <p>Exposure (short-/long-term?)</p>                                     | <p>The measurement of serum folate provides information on the short-term folate status of the individual. Serum folate is the earliest indicator of altered folate exposure and will reflect recent dietary intake (4). Repeated measures over time in the same individual may reflect chronic folate deficiency.</p>                                                                                                                                                                                                                                                                                                                                                                                                                                                                                                                                                                                                                      |
| <p>Status: are there validated norms to define deficiency/adequacy?</p> | <p>During the late 1960s, biological cut-off points for sequential stages of folate deficiency were established through depletion/repletion experiments. A serum folate concentration &lt;7 nmol/L (3 ng/mL) indicated negative folate balance at the time the blood sample was drawn (5). More recently, cut-off points for folate deficiency (serum folate &lt;10 nmol/L) were defined based on a metabolic indicator (increased plasma total homocysteine [Hcy]) (6). These cut-off points have been recommended by the 2005 WHO Technical Consultation on Folate and Vitamin B12 Deficiencies for the assessment of folate status of populations (7, 8).</p> <p>The measurement of serum folate may further elucidate the role of folate in relation to various health outcomes, however, no cut-off points indicative of low or high serum folate concentrations or desirable ranges have been identified in this context to date.</p> |

## Online Supporting Material

|                                                                                                                                                                                                                                                                                                                                                                                               |                                                                                                                                                                                                                                                                                                                                                                                                                                                                                                                                                                                                                                                                                                                                                                                                                                                                                                                                                                                                                                                                                                                                                                                                                                         |
|-----------------------------------------------------------------------------------------------------------------------------------------------------------------------------------------------------------------------------------------------------------------------------------------------------------------------------------------------------------------------------------------------|-----------------------------------------------------------------------------------------------------------------------------------------------------------------------------------------------------------------------------------------------------------------------------------------------------------------------------------------------------------------------------------------------------------------------------------------------------------------------------------------------------------------------------------------------------------------------------------------------------------------------------------------------------------------------------------------------------------------------------------------------------------------------------------------------------------------------------------------------------------------------------------------------------------------------------------------------------------------------------------------------------------------------------------------------------------------------------------------------------------------------------------------------------------------------------------------------------------------------------------------|
| <p>Function: does biomarker reflect direct function, (e.g, enzyme stimulation assays) or indirectly reflect function of biological systems, (e.g. growth)</p>                                                                                                                                                                                                                                 | <p>Serum folate reflects recent folate intake and indicates short-term status, whereas RBC folate represents the amount of folate that accumulates in blood cells during erythropoiesis and is a long-term indicator of folate status. Recurrent measures of serum folate on the same individual overtime can reveal chronic folate deficiency.</p> <p>Thus serum folate reflects a different folate pool than RBC folate, and shows a moderate but variable correlation with RBC folate (<math>r</math> in the range 0.41 to 0.63) in different populations (9).</p>                                                                                                                                                                                                                                                                                                                                                                                                                                                                                                                                                                                                                                                                   |
| <p>Effect: does the biomarker directly reflect a response to an intervention either positive or negative?</p>                                                                                                                                                                                                                                                                                 | <p>Serum folate is highly responsive to intervention with folic acid, with natural food folates typically resulting in a poorer serum folate response compared to folic acid at similar intervention levels. Likewise, population data show that serum folate concentrations are highly reflective of exposure to folic acid, with the highest concentrations observed in people who consume folic acid in both supplements and fortified foods, both in regions with mandatory fortification and voluntary-only fortification (10-12).</p> <p>Serum folate increased in a linear, dose-dependent manner in response to intervention with folic acid at doses of 200, 400 and 800 <math>\mu\text{g}/\text{d}</math> for 6 months (13).</p>                                                                                                                                                                                                                                                                                                                                                                                                                                                                                              |
| <p><b>User groups considerations for biomarker with regard to serum folate:</b></p>                                                                                                                                                                                                                                                                                                           |                                                                                                                                                                                                                                                                                                                                                                                                                                                                                                                                                                                                                                                                                                                                                                                                                                                                                                                                                                                                                                                                                                                                                                                                                                         |
| <p><b>Population</b><br/>(e.g. policy makers assessing status of population; agencies conducting national surveys; agencies responsible for development, implementation, and evaluation of food/nutrient based programs)</p> <p>Different environment and resources:</p> <ul style="list-style-type: none"> <li>• developed countries</li> <li>• developing-low resource countries</li> </ul> | <p>Although serum folate is a marker for short term folate exposure, it is the most practical marker for large scale studies in populations. As noted in section 5, stable assays which can be verified and controlled in-house are preferable for population assessments. Due to manufacture recalibration or reformulation, assay kit assays can change over time and thus may not be a good choice for a public health laboratory that needs to monitor trends in folate concentration distributions in a population over time and compare folate status between population groups in different countries (14). For low-resource settings, the microbiologic assay (MBA) is the method of choice because it is the least expensive assay, its calibration and long-term performance can be controlled in-house, and it generates results that are generally in good agreement with higher-order LC-MS/MS methods. The CDC has developed a Nutrition Survey Toolkit that describes in detail how specimens can be collected, handled and assayed by the MBA (15). The use of blood spots collected on filter paper is being explored for use in developing countries where obtaining and managing serum samples may be difficult.</p> |

## Online Supporting Material

|                                                                                                                                                                                                       |                                                                                                                                                                                                                                                                                                                                                                                                                                                                                                                                                                                                                                                                                                                                                                                                                                                                                                                                                                                                                                                                                                                                                                                                                                                                                                                                                                                                                                                                                                                                                                                                                                                                                                                    |
|-------------------------------------------------------------------------------------------------------------------------------------------------------------------------------------------------------|--------------------------------------------------------------------------------------------------------------------------------------------------------------------------------------------------------------------------------------------------------------------------------------------------------------------------------------------------------------------------------------------------------------------------------------------------------------------------------------------------------------------------------------------------------------------------------------------------------------------------------------------------------------------------------------------------------------------------------------------------------------------------------------------------------------------------------------------------------------------------------------------------------------------------------------------------------------------------------------------------------------------------------------------------------------------------------------------------------------------------------------------------------------------------------------------------------------------------------------------------------------------------------------------------------------------------------------------------------------------------------------------------------------------------------------------------------------------------------------------------------------------------------------------------------------------------------------------------------------------------------------------------------------------------------------------------------------------|
| <p><b>Research settings</b> (e.g. researchers and educators involved in studies of nutrition/health including development and utilization of biomarkers and training students and research staff)</p> | <p>In research, serum folate is measured in human participants and animal models to investigate the effects of genetics on folate status and requirements, the effects of other nutrients and diets on folate status, and to study folate bioavailability.</p> <p>Serum folate reflects short-term status (<i>exposure</i>), is very responsive to folate intake (<i>effect</i>), and has wide utility in the research setting because there are established reference values and cut-offs (<i>status</i>) based on haematological indices (<i>function</i>) published in the folate DRI (16). Additional cut-offs indicating high or "supranutritional" status (17, 18). As it best reflects short-term status, serum folate is often considered in concert with RBC folate, a folate biomarker indicating long-term status. However, in populations with invariant folate intakes (19) and when measured repeatedly on the same individual over time, serum folate can also reflect long-term status. Serum folate (versus RBC folate) is the preferred status marker in dose-response studies where repeated measures of serum folate are obtained within the same individual to assess response to a known folate intake. It is important that interpretation of serum folate values in research settings fully consider the variety of biological and contextual factors (covered in detail below) that can impact circulating concentrations. Serum total folate is the most widely utilized folate biomarker; however, serum folate vitamers, including 5-methyltetrahydrofolate (20), formyl folate (20, 21), and folic acid (17, 22-25) are also important folate biomarkers in the research setting.</p> |
| <p><b>Clinical settings</b></p>                                                                                                                                                                       | <p>Folate biomarkers used within the clinical context have more validity than when used in the absence of clinical information. Folate status is often altered during a number of pathological conditions, including cancer, psoriasis, inflammatory bowel disease, hemolytic anaemia, HIV infection and kidney failure (see below). The primary aim of folate testing in clinical laboratories is to determine whether a patient is folate deficient. Serum folate is a useful marker of folate status in the clinical setting, although it is somewhat labile with levels influenced by recent consumption of a high folate meal, folic acid supplement or alcohol. It has been shown that serum folate levels may be in the normal range in patients who have clear clinical evidence of folate deficiency and may be low in patients without clinical abnormalities. Repeated measures over time can make serum folate testing more informative. Confirmatory testing using a second marker such as Hcy is helpful.</p>                                                                                                                                                                                                                                                                                                                                                                                                                                                                                                                                                                                                                                                                                        |

## Online Supporting Material

|                                                                                                                                         |                                                                                                                                                                                                                                                                                                                                                                                                                                                                                                                                                                                                                                                                                                                                                                                                                                                                                                                                                                                        |
|-----------------------------------------------------------------------------------------------------------------------------------------|----------------------------------------------------------------------------------------------------------------------------------------------------------------------------------------------------------------------------------------------------------------------------------------------------------------------------------------------------------------------------------------------------------------------------------------------------------------------------------------------------------------------------------------------------------------------------------------------------------------------------------------------------------------------------------------------------------------------------------------------------------------------------------------------------------------------------------------------------------------------------------------------------------------------------------------------------------------------------------------|
|                                                                                                                                         | <p>Clinical laboratories require inexpensive, automated, and high throughput assays to be able to report results within a day or less of receiving a sample. Protein-binding assays have been developed with the clinical laboratory in mind, to enable the diagnosis of folate deficiency. Most are fully automated for clinical analyzers to provide high throughput measurements with turnaround times of less than 1 h. Further, unlike the microbiologic assay they are not influenced by the presence of antibiotics or antifolates which may inhibit bacterial growth and could be an issue when working in the clinical setting.</p>                                                                                                                                                                                                                                                                                                                                           |
| <p><b>Biological Factors; impact of the following on interpretation of each biomarker:</b></p>                                          |                                                                                                                                                                                                                                                                                                                                                                                                                                                                                                                                                                                                                                                                                                                                                                                                                                                                                                                                                                                        |
| <p>Race/ethnicity</p>                                                                                                                   | <p>Folic acid fortification in the US, enacted in 1998, has markedly improved all markers of folate status across all ethnicities. Comparing data from NHANES III 1988—1994 with NHANES 1999-2000, NHANES 2001-2002 and NHANES 2003-2006, shows an approximate 130% and 60% increase in serum folate and RBC folate, respectively, and a moderate decline in plasma Hcy of 20% (26, 27). Notably, both before and after fortification, non-Hispanic whites (NHW) have higher serum and RBC folate than Mexican Americans (MA). Non-Hispanic blacks (NHB) have the lowest level of serum and RBC folate (26, 27). The differences in folate status according to ethnicity may be due to higher folate requirements in NHB (28) and/or higher intake of folate in NHW (11). In a recent analysis of NHANES 2003-2006 data, race-ethnic differentials in serum and RBC folate concentrations remained significant after adjustment for sociodemographic and lifestyle variables (29).</p> |
| <p>Age-life stage/<br/>endocrinology<br/>(infants/children;<br/>adolescents; women of<br/>reproductive age;<br/>pregnancy; elderly)</p> | <p><u>Age and gender:</u> Folate biomarkers and their interrelations change markedly from birth to senescence. Infants (&lt; 1 year of age) have a biochemical profile characterized by relatively high serum folate (~ 30 nmol/L), relatively high Hcy (~ 7 μmol/L) and low serum cobalamin. RBC folate is high at birth (~ 550 nmol/L) but declines abruptly by nearly 50% within 6 weeks (30). No difference in folate biomarkers according to gender were reported in several studies (30, 31). In contrast, higher serum and RBC folate levels were recently reported for adult (aged ≥ 20 y) women as compared to men from NHANES 2003-2006 (29). This difference remained after adjustment for sociodemographic and lifestyle variables. After one year of age, serum folate declined markedly and RBC folate declined moderately. No differences in folate</p>                                                                                                                 |

biomarkers were observed between girls and boys aged < 15 years (30-33), but in older age groups (32, 33) males attained lower serum folate and slightly lower RBC folate than females (26).

The lowest values for serum folate (~10 nmol/L) and RBC folate (~230 nmol/L) were observed in age ranges of 10 - 40 (26, 30). Thereafter, all three biomarkers increased in both genders (26).

Notably, in infants high serum folate is attributed to methyl folate trapping as demonstrated by reduction of both Hcy and serum folate following cobalamin supplementation (34).

*Pregnancy:* There are substantial changes in folate biomarkers throughout pregnancy. Many studies do not allow quantification of such changes because of lack of preconception levels (35), and comparison of folate concentrations between studies is difficult due to different and non-standardized analytical methodology.

A decrease in serum folate during pregnancy is a common observation whereas the change in RBC folate varies (36). In most (35-38) but not all (39) longitudinal studies, serum folate declines throughout pregnancy, in particular in women carrying the *MTHFR* 677-T allele (40, 41). RBC folate has been reported to show smaller changes with a moderate increase during mid pregnancy (38), or a decrease during the last 2 (37) or 5 months (35, 42). These changes in serum and RBC folate are modified by onset of folic acid intake (43). Plasma folate and RBC folate concentrations are correlated and both are inversely associated with Hcy in pregnant women (35, 42). In a recent analysis of NHANES 2003-2006 data, pregnant compared to non-pregnant women aged 20-49 y had 18% and 26% higher serum and RBC folate concentrations, respectively after adjusting for demographic variables, smoking, use of dietary supplements, fasting, inflammation, and renal function, but without adjusting for total folate intake from foods and supplements (44).

Several mechanisms for the change in folate status during pregnancy have been proposed, including increased folate or methionine demand, increased folate catabolism, increased clearance and excretion of folate, decreased folate absorption, hormonal effects, hemodilution due to plasma volume expansion, increased renal Hcy clearance and decreased Hcy binding to albumin (36).

## Online Supporting Material

|          |                                                                                                                                                                                                                                                                                                                                                                                                                                                                                                                                                                                                                                                                                                                                                                                                                                                                                                                                                                                                                                                                                                                                                                                                                                                                                                                                                                                                                                                                                                                                                                                                                                                                                                                                                                                                                                                                                                                                                                                                                                                                                                                                                                                                                                               |
|----------|-----------------------------------------------------------------------------------------------------------------------------------------------------------------------------------------------------------------------------------------------------------------------------------------------------------------------------------------------------------------------------------------------------------------------------------------------------------------------------------------------------------------------------------------------------------------------------------------------------------------------------------------------------------------------------------------------------------------------------------------------------------------------------------------------------------------------------------------------------------------------------------------------------------------------------------------------------------------------------------------------------------------------------------------------------------------------------------------------------------------------------------------------------------------------------------------------------------------------------------------------------------------------------------------------------------------------------------------------------------------------------------------------------------------------------------------------------------------------------------------------------------------------------------------------------------------------------------------------------------------------------------------------------------------------------------------------------------------------------------------------------------------------------------------------------------------------------------------------------------------------------------------------------------------------------------------------------------------------------------------------------------------------------------------------------------------------------------------------------------------------------------------------------------------------------------------------------------------------------------------------|
|          | <p><u>Oral contraceptives</u>: Early studies on the effect of oral contraceptives (OCs) suggest a negative effect on folate status (45). OCs with low estrogen content have no non-equivocal effect on serum or RBC folate in recent studies controlling for potential confounders, and no conclusion on the effect from OCs on folate status can be made (46).</p> <p><u>Male sex hormones</u> affect the activities of folate metabolizing enzymes in the rat (47), but there is no data showing effects of male sex hormones on folate status in humans.</p>                                                                                                                                                                                                                                                                                                                                                                                                                                                                                                                                                                                                                                                                                                                                                                                                                                                                                                                                                                                                                                                                                                                                                                                                                                                                                                                                                                                                                                                                                                                                                                                                                                                                               |
| Genetics | <p>The (single nucleotide) polymorphisms most commonly investigated in relation to folate status are located on genes encoding for enzymes involved in folate-dependent one-carbon metabolism and Hcy metabolism. These include methylenetetrahydrofolate reductase (<i>MTHFR</i>) c.665C&gt;T (known as 677C&gt;T; p.Ala222Val) and c.1286A4C (known as 1298A&gt;C; p.Glu429Ala), methionine synthase (<i>MTR</i>) c.2756A&gt;G (p.Asp919Gly), methionine synthase reductase (<i>MTRR</i>) c.66A&gt;G(p.Ile22Met), methylenetetrahydrofolate dehydrogenase (<i>MTHFD1</i>) c.1958G&gt;A (p.Arg653Gln), p.Arg239Gln), reduced folate carrier-1 (<i>SLC19A1</i>) c.80G&gt;A (p.Arg27His) (48), cystathionine <i>beta</i>-synthase (<i>CBS</i>) c.844_845ins68 and <i>CBS</i> c.699C&gt;T (p.Tyr233Tyr) (49). The strongest and most consistent effects have been observed for <i>MTHFR</i> 677C&gt;T (50). The <i>MTHFR</i> 1298 A&gt;C variant is also worth mentioning as it is in linkage disequilibrium with <i>MTHFR</i> 677C&gt;T, which has caused considerable confusion in the literature. When the effects of the two variants have been dissected out, it has been shown that 1298 does not significantly affect folate levels. For the other polymorphisms, the associations with folate biomarkers are weak and somewhat inconsistent across different studies, some of which are small and lack power.</p> <p>There are consistent results demonstrating that Hcy increases and serum folate decreases in a dose-response manner according to the number of <i>MTHFR</i> 677-T alleles. These effects are most pronounced in subjects/populations with low folate status, and the inverse association between Hcy and serum folate is strongest in subjects with the TT genotype (50). The <i>MTHFR</i> 677 C-&gt;T polymorphism also seems to alter the distribution of RBC folates by decreasing the relative amount of methylated tetrahydrofolate in subjects with the variant TT genotype (51, 52), but the magnitude of the overall effect on RBC folate is related to the specificity of the applied folate assay (53). These effects on folate in serum and RBC are explained by reduced catalytic activity of MTHFR</p> |

|                 |                                                                                                                                                                                                                                                                                                                                                                                                                                                                                                                                                                                                                                                                                                                                                                                                                                                                                                                                                                                                                                                                                                                                                                                                                                                                                                                                                                                                                                                                                                                                                                                                                                                                                                                                                                                                                                                                                                                                                                                                                                                                                                                                                                                                                          |
|-----------------|--------------------------------------------------------------------------------------------------------------------------------------------------------------------------------------------------------------------------------------------------------------------------------------------------------------------------------------------------------------------------------------------------------------------------------------------------------------------------------------------------------------------------------------------------------------------------------------------------------------------------------------------------------------------------------------------------------------------------------------------------------------------------------------------------------------------------------------------------------------------------------------------------------------------------------------------------------------------------------------------------------------------------------------------------------------------------------------------------------------------------------------------------------------------------------------------------------------------------------------------------------------------------------------------------------------------------------------------------------------------------------------------------------------------------------------------------------------------------------------------------------------------------------------------------------------------------------------------------------------------------------------------------------------------------------------------------------------------------------------------------------------------------------------------------------------------------------------------------------------------------------------------------------------------------------------------------------------------------------------------------------------------------------------------------------------------------------------------------------------------------------------------------------------------------------------------------------------------------|
|                 | <p>encoded by the 677 variant T-allele (so-called thermolabile enzyme), which has lower affinity for methylenetetrahydrofolate (and FAD), leading to impaired formation of 5-methyltetrahydrofolate and its polyglutamated derivatives (in RBC) (50).</p> <p>The <i>MTHFR</i> 677C-&gt;T distribution is different across geographic regions and ethnic groups. The T-allele frequency is 0.15 – 0.17 in south Asia, 0.30 – 0.35 in northern Europe, 0.39 or higher in Japan and 0.45 in Italy (54), 0.33 among US NHW, 0.11 among US NHB and 0.45 among US MA (55). The prevalences of the variant alleles of <i>MTHFR</i> 1298 A-&gt;C and <i>MTRR</i> 66A-&gt;G are also significantly higher among NHW than among NHB or MA (55).</p> <p>In the prefortification US population (NHANES III), persons with the <i>MTHFR</i> 677 TT genotype had a 22.1% (95% CI: 14.6%, 28.9%) lower serum folate and a 25.7% (95% CI: 18.6%, 33.2%) higher Hcy concentration than did persons with the CC genotype (55). The difference in serum folate becomes abolished in subjects taking &gt; 400 µg/d of folic acid whereas the Hcy difference is only moderately reduced by supplementation or moderate intake of folic acid (56), but higher in Asia and Europe as compared to the US and ANZ (54).</p> <p>The serum folate response to intervention with folic acid (irrespective of dose) is however strongly affected by the common 677 C&gt;T polymorphism in <i>MTHFR</i>. One large randomized controlled trial (RCT) in China showed that despite 6 months of supplementation with 4000 µg/d folic acid, women with the <i>MTHFR</i> 677TT genotype achieved lower serum folate and higher plasma Hcy concentrations than did those with the CC genotype (56).</p> <p>In the prefortification US population, differences in serum folate by <i>MTHFR</i> 677C-&gt;T genotype were noted for all race-ethnicity groups, with serum folate values lower among NHB (34 %), NHW (20%) and MA (21%) of the TT as compared with the CT genotype (55).</p> <p>See Table 12 for a description of the impact of poor riboflavin status on serum folate concentrations in individuals with the <i>MTHFR</i> 677 TT genotype.</p> |
| Body mass index | <p>There are several reports on an inverse relation between serum folate and BMI in both genders and in different age groups (29, 57-63). Studies on RBC folate and BMI are less consistent, demonstrating either a positive (29, 63) or no (58, 62, 64) association.</p>                                                                                                                                                                                                                                                                                                                                                                                                                                                                                                                                                                                                                                                                                                                                                                                                                                                                                                                                                                                                                                                                                                                                                                                                                                                                                                                                                                                                                                                                                                                                                                                                                                                                                                                                                                                                                                                                                                                                                |

## Online Supporting Material

|                                     |                                                                                                                                                                                                                                                                                                                                                                                                                                                                                                                                                                                                                                                                                                                                                                                                                                                                                                                                                                                                                                                                                                                                                                                                                                                                                                                                                                                                                                                                                                                                                  |
|-------------------------------------|--------------------------------------------------------------------------------------------------------------------------------------------------------------------------------------------------------------------------------------------------------------------------------------------------------------------------------------------------------------------------------------------------------------------------------------------------------------------------------------------------------------------------------------------------------------------------------------------------------------------------------------------------------------------------------------------------------------------------------------------------------------------------------------------------------------------------------------------------------------------------------------------------------------------------------------------------------------------------------------------------------------------------------------------------------------------------------------------------------------------------------------------------------------------------------------------------------------------------------------------------------------------------------------------------------------------------------------------------------------------------------------------------------------------------------------------------------------------------------------------------------------------------------------------------|
|                                     | <p>The link between obesity and low folate status is potentially important in women of childbearing age, since both are risk factors for birth defects, including NTD (64). BMI was associated with low serum folate in US women aged 17 – 49 years both before (NHANES III) and after (NHANES 1999 - 2000) folic acid fortification, and the association was strongest in women aged &gt; 20 years. Women with high BMI used less supplements and had lower folate intake from food, but the inverse association between BMI and serum folate persisted after adjustment for these factors and after adjustment for insulin levels and glucose. The latter observation indicates that insulin resistance does not fully explain the BMI-serum folate association (64). A recent study analyzing postfortification data from the NHANES 2003–2004, 2005–2006, and 2007–2008 cycles demonstrated that RBC folate increases with increasing BMI both in supplement users and non-users (63). This suggests the BMI affects cellular uptake and tissue distribution of folate. Furthermore, an inverse association between serum folate and BMI was only observed among supplement non-users suggesting that high intake of folic acid may compensate for altered folate distribution in obese women (63). Experimental evidence of differences in the pharmacokinetic response to the current recommended dose of folic acid between obese and normal weight women of childbearing age was provided by a recent study by da Silva et al. (65).</p> |
| Endemic disease (e.g. malaria; HIV) | <p><u><i>Malaria:</i></u> There is some evidence that malarial infection may induce folate deficiency in adults (66). The causes include inadequate intake, malabsorption, hemolysis and antimalarial drugs. Notably, there are consistent reports of increased RBC folate in malarial infection (67, 68), which has been attributed to de novo parasite folate synthesis or predisposition of malaria in subjects with high RBC folate. Malaria may also induce increased hemolysis of folate-rich cells that can lead to an increase in serum folate. The levels of folate biomarkers in malaria seems to be influenced by the infection itself and their usefulness to assess folate status is uncertain.</p> <p><u><i>HIV/AIDS:</i></u> Micronutrient deficiencies are common in subjects with HIV/AIDS (69). Low serum folate or RBC folate (70) has been reported in HIV-infected pregnant women (71), children (72) and adults (73) in developing countries, but folate status was normal in a study of HIV infected children in New York (74).</p>                                                                                                                                                                                                                                                                                                                                                                                                                                                                                       |



## Online Supporting Material

|              |                                                                                                                                                                                                                                                                                                                                                                                                                                                                                                                                                                                                                                                                                                                                                                                                                                                                                                                                                                                                                                                                                                                                                                                                                                                                                                                                                                                                                                                                                                                                                      |
|--------------|------------------------------------------------------------------------------------------------------------------------------------------------------------------------------------------------------------------------------------------------------------------------------------------------------------------------------------------------------------------------------------------------------------------------------------------------------------------------------------------------------------------------------------------------------------------------------------------------------------------------------------------------------------------------------------------------------------------------------------------------------------------------------------------------------------------------------------------------------------------------------------------------------------------------------------------------------------------------------------------------------------------------------------------------------------------------------------------------------------------------------------------------------------------------------------------------------------------------------------------------------------------------------------------------------------------------------------------------------------------------------------------------------------------------------------------------------------------------------------------------------------------------------------------------------|
| Inflammation | <p>It is difficult to conclude from published data whether folate biomarkers are related to inflammation, because the data are inconsistent, and the underlying condition leading to inflammation may itself affect folate status. It has been stated that serum folate and to a lesser extent RBC folate are low during acute inflammation (75), but the supportive data are not convincing.</p> <p>Plasma/serum folate and Hcy are not related to C-reactive protein (CRP) and other inflammatory markers in healthy middle aged subjects in the Atherosclerosis Risk in Communities (ARIC) study (76) or to inflammation (as assessed by CRP) in participants from the population-based Framingham Heart Study cohort (77). Supplementation with folic acid does not affect the level of inflammatory biomarkers in most studies (78, 79) but did so in one study (80). It is possible that folate status is related to expression of proteins involved in activation and regulation of immune function that are not captured by CRP (81).</p>                                                                                                                                                                                                                                                                                                                                                                                                                                                                                                    |
| Disease      | <p><u>Cancer</u>: Patients with established cancer, particularly at advanced stages may have low folate status, as measured by low circulating folate and high Hcy (82, 83). The mechanisms involved may include inadequate folate intake, increased folate requirements due to accelerated DNA synthesis, increased folate catabolism by cancer cells (45, 83) and antifolate chemotherapy (82, 84).</p> <p><u>Psoriasis</u>: Patients with psoriasis have lower folate levels and higher Hcy than healthy controls. Notably, blood levels of other B-vitamins are often normal (85). Concentrations of Hcy are related to disease severity but also to low folate levels in psoriatics (86). The most likely explanation is increased folate requirement due to increased keratinocyte turnover, but lifestyle factors, obesity (85) and methotrexate therapy (87) may contribute as well.</p> <p><u>Inflammatory bowel disease</u>: Blood levels of several micronutrients, including folate, are often low in patients with inflammatory bowel disease (IBD), in particular Crohn's disease (CD). Most studies on folate status involve measurement of serum folate, which demonstrate a prevalence of deficiency of about 25%. A few studies based on RBC folate demonstrate a lower prevalence, and RBC folate may be a more accurate test since it reflects long term-status (88). Notably, it has been recommended that low circulating folate in IBD should be confirmed by Hcy measurement, regarded as a more sensitive test in these</p> |

|                                                                                             |                                                                                                                                                                                                                                                                                                                                                                                                                                                                                                                                                                                                                                                                                                                                                                                                                                                                                                                                                                                                                                                                                                                                                                                                                                                                                                                                                                                                                                                                                                                                                                                                                                                                                                                                                                                                                                                                                                                                                                                                                                                                                                                                                                                                                                                                                                                                                                                                                                                                                                                       |
|---------------------------------------------------------------------------------------------|-----------------------------------------------------------------------------------------------------------------------------------------------------------------------------------------------------------------------------------------------------------------------------------------------------------------------------------------------------------------------------------------------------------------------------------------------------------------------------------------------------------------------------------------------------------------------------------------------------------------------------------------------------------------------------------------------------------------------------------------------------------------------------------------------------------------------------------------------------------------------------------------------------------------------------------------------------------------------------------------------------------------------------------------------------------------------------------------------------------------------------------------------------------------------------------------------------------------------------------------------------------------------------------------------------------------------------------------------------------------------------------------------------------------------------------------------------------------------------------------------------------------------------------------------------------------------------------------------------------------------------------------------------------------------------------------------------------------------------------------------------------------------------------------------------------------------------------------------------------------------------------------------------------------------------------------------------------------------------------------------------------------------------------------------------------------------------------------------------------------------------------------------------------------------------------------------------------------------------------------------------------------------------------------------------------------------------------------------------------------------------------------------------------------------------------------------------------------------------------------------------------------------|
|                                                                                             | <p>patients (88). The most important mechanisms behind impaired folate status are enteric loss, malabsorption, inadequate intake of folate, and treatment with folate antagonists like sulfasalazine (88).</p> <p><u><i>Sickle cell disease (SCD):</i></u> Low serum and RBC folate (89, 90) have been reported in SCD in most but not all studies (91-93). Low RBC folate has been detected even in subjects prescribed folic acid supplements (90). RBC folate, however, does not seem to be an adequate measure of folate status in SCD patients because RBC folate increases with decreasing RBC age; therefore serum folate and Hcy have been recommended for assessment of folate status in these patients (94). However, the accuracy of folate biomarkers to assess folate status in SCD may vary according to intake of folic acid supplements, age and renal function (93).</p> <p><u><i>Thyroid Disease:</i></u> Folate and Hcy status change according to thyroid state. Hypothyroid patients have low RBC and serum folate and elevated Hcy, whereas hyperthyroid patients have an opposite profile with elevated RBC and serum folate and low Hcy (95-97). These changes have been documented in longitudinal studies of patients during treatment, which normalizes thyroid state (95, 98-101). Altered folate status has been attributed to effects of thyroid hormones on folate metabolism including altered riboflavin status (100, 102) that in turn affects the FAD-dependent MTHFR.</p> <p><u><i>Diabetes:</i></u> Studies have demonstrated moderately elevated serum/plasma folate in type 1 and type 2 diabetic patients (103-105), adequate serum and RBC folate in type 1 and type 2 diabetic patients (106, 107), and lower serum folate in type 2 diabetics than in healthy controls (108). Thus, no equivocal conclusion can be made on the effect of the diabetic state itself on circulating folate.</p> <p><u><i>Renal failure:</i></u> Patients with renal failure have deficiencies of several water soluble micronutrients and B-vitamins, including folate (109). Serum and RBC folate are often below normal values in chronic renal impairment (110), and folate deficiency is more frequent in hemodialysis than peritoneal dialysis patients (111, 112). Treatment of renal patients with folic acid normalizes circulating folate. These observations suggest impaired folate function in renal patients, who might require larger folate intake than healthy subjects.</p> |
| <p><b>Contextual Factors; impact of the following on performance of each biomarker:</b></p> |                                                                                                                                                                                                                                                                                                                                                                                                                                                                                                                                                                                                                                                                                                                                                                                                                                                                                                                                                                                                                                                                                                                                                                                                                                                                                                                                                                                                                                                                                                                                                                                                                                                                                                                                                                                                                                                                                                                                                                                                                                                                                                                                                                                                                                                                                                                                                                                                                                                                                                                       |

## Online Supporting Material

|                                                                               |                                                                                                                                                                                                                                                                                                                                                                                                                                                                                                                                                                                                                                                                                                                                                                                                                                                                                                                                                                                                                                                                                                                                                                                                                                                                                                                                                                                                                                                                                                                                                                                                                                                                                                                                                                                                                                 |
|-------------------------------------------------------------------------------|---------------------------------------------------------------------------------------------------------------------------------------------------------------------------------------------------------------------------------------------------------------------------------------------------------------------------------------------------------------------------------------------------------------------------------------------------------------------------------------------------------------------------------------------------------------------------------------------------------------------------------------------------------------------------------------------------------------------------------------------------------------------------------------------------------------------------------------------------------------------------------------------------------------------------------------------------------------------------------------------------------------------------------------------------------------------------------------------------------------------------------------------------------------------------------------------------------------------------------------------------------------------------------------------------------------------------------------------------------------------------------------------------------------------------------------------------------------------------------------------------------------------------------------------------------------------------------------------------------------------------------------------------------------------------------------------------------------------------------------------------------------------------------------------------------------------------------|
| Sample source                                                                 | While most laboratories prefer serum over plasma, both matrices generally produce comparable results for serum total folate (113-115), as long as the sample processing is not delayed (116).                                                                                                                                                                                                                                                                                                                                                                                                                                                                                                                                                                                                                                                                                                                                                                                                                                                                                                                                                                                                                                                                                                                                                                                                                                                                                                                                                                                                                                                                                                                                                                                                                                   |
| Bioavailability                                                               | Serum folate is often used in acute studies in research settings to reflect differences in folate bioavailability when provided as a bolus dose/meal.                                                                                                                                                                                                                                                                                                                                                                                                                                                                                                                                                                                                                                                                                                                                                                                                                                                                                                                                                                                                                                                                                                                                                                                                                                                                                                                                                                                                                                                                                                                                                                                                                                                                           |
| Fasting; time of day; time of exposure/meal/intervention                      | <p>Data from several thousand U.S. adults participating in NHANES 2003–2006 have shown that samples from fasted (<math>\geq 8</math> h, no dietary supplement consumed during the fast) participants had on average significantly lower serum (10%) and RBC folate (5%) concentrations compared to samples from non-fasted (<math>&lt; 3</math> h) participants, but the difference was relatively small, indicating that fasting may not be essential when assessing the folate status of populations (44). However, in the individual, serum folate concentrations can increase drastically as a result of folate intake (either with food or as a dietary supplement), reaching a peak concentration <math>\sim 1</math> h after the dose, with peak concentrations dependent on the size of the dose, the baseline folate status, and the vehicle in which folate was administered.</p> <p>The variability of biomarkers over time is critical for their use in epidemiological studies and for being able to judge if or to what extent a single measurement reflects long-term exposure. Reliability of plasma folate was determined in 40 Nurses' Health Study (NHS) participants over 1 -2 years and in 551 patients with stable angina pectoris from the WENBIT study over 3.5 years, and the results were good (ICCs of 0.61 and 0.50, respectively). Notably, in the WENBIT population reproducibility for plasma folate showed a stronger relation to time between measurements than for other nutritional biomarkers, and ICC decreased from 0.71 over 1 month to 0.61 over 1 year and 0.50 over 3.5 years (117). To our knowledge, no data on reliability of RBC folate measurement have been published. The reproducibility of serum/plasma folate over time allows one-time assessment of biomarker status.</p> |
| Drug use (in context of acute or chronic treatment for disease; recreational) | <p>Some drugs have a negative effect on folate status and thereby increase plasma Hcy, but many drugs affect plasma Hcy by mechanisms independent of folate.</p> <p><i>Folate antagonists:</i> Methotrexate (MTX), the most widely known antifolate, has been used to combat cancer since the 1950s and has been especially effective in alleviating</p>                                                                                                                                                                                                                                                                                                                                                                                                                                                                                                                                                                                                                                                                                                                                                                                                                                                                                                                                                                                                                                                                                                                                                                                                                                                                                                                                                                                                                                                                        |

|                    |                                                                                                                                                                                                                                                                                                                                                                                                                                                                                                                                                                                                                                                                                                                                                                                                                                                                                                                                                                                                                                                                                                                                                                                                                                                                                                                                                                                                                                                                                                                                                                                                                                                                                                                                                                       |
|--------------------|-----------------------------------------------------------------------------------------------------------------------------------------------------------------------------------------------------------------------------------------------------------------------------------------------------------------------------------------------------------------------------------------------------------------------------------------------------------------------------------------------------------------------------------------------------------------------------------------------------------------------------------------------------------------------------------------------------------------------------------------------------------------------------------------------------------------------------------------------------------------------------------------------------------------------------------------------------------------------------------------------------------------------------------------------------------------------------------------------------------------------------------------------------------------------------------------------------------------------------------------------------------------------------------------------------------------------------------------------------------------------------------------------------------------------------------------------------------------------------------------------------------------------------------------------------------------------------------------------------------------------------------------------------------------------------------------------------------------------------------------------------------------------|
|                    | <p>inflammation in patients with rheumatoid arthritis.</p> <p>Structurally, MTX is an analog of folic acid with modifications that result in a higher affinity for the drug's enzyme target, dihydrofolate reductase (DHFR) (118). Accordingly, methotrexate decreases circulating folate and increases Hcy. This response is observed at low doses used in patients with psoriasis (87) or rheumatoid arthritis (119, 120) to high doses given to cancer patients (82), and is explained by inhibition DHFR. The antibiotic, trimethoprim, is also a DHFR inhibitor, and has a similar effect on folate (121).</p> <p><u>Anticonvulsants:</u> Conventional antiepileptic drugs (AEDs) like carbamazepine, phenobarbital, primidone and phenytoin are associated with reduced plasma folate and markedly elevated Hcy (122, 123). This effect has been explained by increased degradation and elimination of folate, secondary to the marked induction of liver enzymes caused by these drugs (45). New AEDs such as levetiracetam and lamotrigine have no or less inductive potential and no effect on folate and Hcy status (122, 123).</p> <p><u>Antihypertensive drugs:</u> Therapy with diuretics including hydrochlorothiazid is associated with decreased circulating folate and elevated Hcy. The underlying mechanisms may involve folate depletion and impaired renal function (124).</p> <p><u>Warfarin:</u> RBC but not serum folate is decreased in patients after 6 months on warfarin therapy. Whether altered folate status is caused by warfarin itself, or is secondary to dietary advice in these patients, is uncertain. There is no increase in Hcy, which may reflect increased baseline Hcy after the acute event preceding therapy (125).</p> |
| Coffee Consumption | <p>Coffee consumption is associated with a decrease in plasma folate (126, 127), vitamin B6 and riboflavin (but not vitamin B12) and parallel increase in Hcy (127). Thus, coffee drinkers have lower mean folate and higher mean Hcy than non-drinkers, but the differences are only observed at the higher end of the folate distribution (127, 128) and at the lower end of the Hcy distribution (129). Possible mechanisms involved are increased renal excretion of folate (at high plasma folate) mediated by caffeine (127).</p>                                                                                                                                                                                                                                                                                                                                                                                                                                                                                                                                                                                                                                                                                                                                                                                                                                                                                                                                                                                                                                                                                                                                                                                                                               |
| Smoking tobacco    | <p>Smoking is associated with deficiencies of several micronutrients and B-vitamins, including folate. Smokers have lower RBC and plasma/serum folate and higher Hcy than non-smokers (29, 130, 131). Folate and Hcy status improve somewhat within days of smoking cessation, but</p>                                                                                                                                                                                                                                                                                                                                                                                                                                                                                                                                                                                                                                                                                                                                                                                                                                                                                                                                                                                                                                                                                                                                                                                                                                                                                                                                                                                                                                                                                |

## Online Supporting Material

|                                        |                                                                                                                                                                                                                                                                                                                                                                                                                                                                                                                                                                                                                                                                                                                                                                                                                                                                                      |
|----------------------------------------|--------------------------------------------------------------------------------------------------------------------------------------------------------------------------------------------------------------------------------------------------------------------------------------------------------------------------------------------------------------------------------------------------------------------------------------------------------------------------------------------------------------------------------------------------------------------------------------------------------------------------------------------------------------------------------------------------------------------------------------------------------------------------------------------------------------------------------------------------------------------------------------|
|                                        | <p>there is a long-term effect in ex-smokers lasting for years with ex-smokers having lower folate and higher Hcy than never smokers (132). It has been suggested that the acute effect of smoking is related to increased folate breakdown or utilization caused by toxic (prooxidant) chemicals, which is in agreement with persistence of low folate after adjustment for dietary intake. The chronic effect may be explained by imprudent dietary habits of ex-smokers in combination with the time required to replenish folate stores (132).</p>                                                                                                                                                                                                                                                                                                                               |
| Alcohol consumption                    | <p>The associations between folate and Hcy status and alcohol intake are inconsistent and complex and related to type and amount of alcohol. Intake of beer and to a lesser extent wine may be positively associated with circulating folate and inversely related to Hcy, which may partly be related to vitamin content in beer (128). However, these associations could be confounded by nutrition and lifestyle factors. In a controlled intervention study, 2 weeks with red wine or vodka (24 g ethanol daily) decreased serum folate and increased Hcy (133). Excessive alcohol intake or alcoholism is associated with B-vitamin deficiencies including impaired folate status (45, 134). The ethanol related folate-deficiency has been explained by low intake, malabsorption, altered liver metabolism, increased catabolism and renal excretion of folate (45, 135).</p> |
| Exercise                               | <p>Data on associations between exercise in leisure time and folate are limited (136), but there are reports on higher levels of serum folate in physically active persons (137, 138). Physical activity is associated with several potential confounders, including nutritional and life-style factors and physiological and metabolic changes. Thus, from published results one cannot conclude that physical exercise has a direct effect on biomarkers of folate status. In a recent analysis of NHANES 2003-2006 data, US adults who expended 750 vs. 150 total metabolic equivalent tasks minutes/week from leisure-time physical activity had slightly higher serum (1.4%) and RBC folate (0.6%) concentrations after adjustment for sociodemographic and lifestyle variables (29).</p>                                                                                       |
| Socioeconomic (e.g. education; income) | <p>A recent report from NHANES 2003-2006 (31) indicated that the socioeconomic variables of education and family poverty-income ratio were significantly associated with serum and RBC folate, however they did not account for much of the variability in biomarker concentration.</p>                                                                                                                                                                                                                                                                                                                                                                                                                                                                                                                                                                                              |

## Online Supporting Material

|                     |                                                                                                                                                                                                                                                                                                                                                                                                                                                                                                                                                                                                                                                                                                                                                                                                                                            |
|---------------------|--------------------------------------------------------------------------------------------------------------------------------------------------------------------------------------------------------------------------------------------------------------------------------------------------------------------------------------------------------------------------------------------------------------------------------------------------------------------------------------------------------------------------------------------------------------------------------------------------------------------------------------------------------------------------------------------------------------------------------------------------------------------------------------------------------------------------------------------|
| Seasonal variations | A cross-sectional study indicated seasonal variation in serum and RBC folate (139) whereas a longitudinal study on an Irish population demonstrated a moderate reduction in RBC folate in spring compared with autumn; no seasonal changes were observed for serum folate and Hcy (140). In a large epidemiological study from China, serum and RBC folate were lower in the spring than in the fall in the North and lower in the fall than in the spring in the South (141). Plasma Hcy was inversely associated with circulating folate across regions and seasons (142). Thus, the seasonal variations in folate biomarker seem to be moderate, might be concealed in a fortified population, are different between geographical regions, and probably reflect seasonal differences in the availability of fresh fruit and vegetables. |
|---------------------|--------------------------------------------------------------------------------------------------------------------------------------------------------------------------------------------------------------------------------------------------------------------------------------------------------------------------------------------------------------------------------------------------------------------------------------------------------------------------------------------------------------------------------------------------------------------------------------------------------------------------------------------------------------------------------------------------------------------------------------------------------------------------------------------------------------------------------------------|

**Red Blood Cell Folate: General Characteristics**

|                                                                  |                                                                                                                                                                                                                                                                                                                                                                                                                                                                                                                                                                                                                                                                                                                                                                                                                                                                                                                               |
|------------------------------------------------------------------|-------------------------------------------------------------------------------------------------------------------------------------------------------------------------------------------------------------------------------------------------------------------------------------------------------------------------------------------------------------------------------------------------------------------------------------------------------------------------------------------------------------------------------------------------------------------------------------------------------------------------------------------------------------------------------------------------------------------------------------------------------------------------------------------------------------------------------------------------------------------------------------------------------------------------------|
| Humans versus animal models versus cell/molecular studies?       | See serum folate (humans versus animal models versus cell/molecular studies) for more information.                                                                                                                                                                                                                                                                                                                                                                                                                                                                                                                                                                                                                                                                                                                                                                                                                            |
| Exposure (short-/long-term?)                                     | RBC folate is a sensitive indicator of longterm folate status. RBC folate compared with serum folate will respond more slowly to changes in dietary folate intake and is a better indicator of folate intake over the previous 3-4 months when circulating folate is incorporated into the maturing red cells (143).                                                                                                                                                                                                                                                                                                                                                                                                                                                                                                                                                                                                          |
| Status: are there validated norms to define deficiency/adequacy? | During the late 1960's, biological cut-off points for sequential stages of folate deficiency were established through depletion/repletion experiments. A RBC folate concentration <363 nmol/L (160 ng/mL) indicated the onset of folate depletion, concentrations <272 nmol/L (120 ng/mL) marked the beginning of folate-deficient erythropoiesis, and concentrations <227 nmol/L (100 ng/mL) marked folate-deficient anemia (5). It was more common though for investigators to use a single cutoff point for RBC folate to designate deficiency: <317 nmol/L (140 ng/mL) (144). More recently, cut-off points for folate deficiency (RBC folate <340 nmol/L) were defined based on a metabolic indicator (increased plasma total Hcy) (6). These cut-off points have been recommended by the 2005 WHO Technical Consultation on Folate and Vitamin B12 Deficiencies for the assessment of folate status of populations (7). |

## Online Supporting Material

|                                                                                                                                                                                                                                                                                                                                                                                            |                                                                                                                                                                                                                                                                                                                                                                                                                                                                                                                                                                                                                                                                                                                                                                                                                                                                                                                                                                                                                  |
|--------------------------------------------------------------------------------------------------------------------------------------------------------------------------------------------------------------------------------------------------------------------------------------------------------------------------------------------------------------------------------------------|------------------------------------------------------------------------------------------------------------------------------------------------------------------------------------------------------------------------------------------------------------------------------------------------------------------------------------------------------------------------------------------------------------------------------------------------------------------------------------------------------------------------------------------------------------------------------------------------------------------------------------------------------------------------------------------------------------------------------------------------------------------------------------------------------------------------------------------------------------------------------------------------------------------------------------------------------------------------------------------------------------------|
| <p>Function: does biomarker reflect direct function, e.g. enzyme stimulation assays or indirectly reflect function of biological systems, e.g. growth</p>                                                                                                                                                                                                                                  | <p>RBC folate parallels liver concentrations (accounting for about 50% of total body folate) and is thus considered to reflect tissue folate stores (145). RBC folate represents the amount of folate that accumulates in blood cells during erythropoiesis and reflects folate status during the preceding 120 days, i.e. the half-life of red cells (146, 147).</p> <p>RBC folate and serum folate reflect different folate pools; RBC shows a moderate but variable correlation with serum folate (<math>r</math> in the range 0.41 to 0.63) in different populations (9).</p>                                                                                                                                                                                                                                                                                                                                                                                                                                |
| <p>Effect: does the biomarker directly reflect a response to an intervention either positive or negative?</p>                                                                                                                                                                                                                                                                              | <p>RBC folate is highly responsive to intervention with folic acid, with natural food folates typically resulting in a poorer RBC folate response compared to folic acid at similar intervention levels. Likewise, population data show that RBC folate concentrations are highly reflective of exposure to folic acid, with the highest concentrations observed in people who consume folic acid in both supplements and fortified foods, both in regions with mandatory fortification and voluntary-only fortification (11, 12).</p> <p>As circulating folate is incorporated into red cells during erythropoiesis and the average life-span of red cells is 120 days (143), intervention trial periods of 3-4 months are considered necessary in order to allow an optimal RBC folate response to an increase in folate intake to be observed. The RBC folate response to intervention with folic acid (irrespective of dose) is strongly affected by the common 677 C&gt;T polymorphism in <i>MTHFR</i>.</p> |
| <p><b>User groups considerations for biomarker with regard to RBC folate:</b></p>                                                                                                                                                                                                                                                                                                          |                                                                                                                                                                                                                                                                                                                                                                                                                                                                                                                                                                                                                                                                                                                                                                                                                                                                                                                                                                                                                  |
| <p><b>Population</b><br/>(e.g. policy makers assessing status of population; agencies conducting national surveys; agencies responsible for development, implementation, and evaluation of food/nutrient based programs)<br/>Different environment and resources:</p> <ul style="list-style-type: none"> <li>• developed countries</li> <li>• developing-low resource countries</li> </ul> | <p>Red cell folate is a marker for longer term (months) folate exposure. There are, however, obstacles to using it in population studies because the specimen preparation (generation of a whole blood hemolysate using accurate pipetting) is more difficult than for serum folate, and red cell folate assays are prone to more variability and less agreement across assay platforms. Kit assays can change over time as a result of manufacturer recalibration or reformulation, and may not be a good choice for a public health laboratory that needs to monitor trends in folate concentration distributions in a population over time and compare folate status between population groups in different countries (14). Detailed specimen processing protocols and thorough training of field staffs are essential if this marker is to be used successfully in large scale population studies, particularly those in low</p>                                                                             |

## Online Supporting Material

|                                                                                                                                                                                                       |                                                                                                                                                                                                                                                                                                                                                                                                                                                                                                                                                                                                                                                                                                                                                                                                                                                                                                                                                                                                                                                                                                                                                                                                       |
|-------------------------------------------------------------------------------------------------------------------------------------------------------------------------------------------------------|-------------------------------------------------------------------------------------------------------------------------------------------------------------------------------------------------------------------------------------------------------------------------------------------------------------------------------------------------------------------------------------------------------------------------------------------------------------------------------------------------------------------------------------------------------------------------------------------------------------------------------------------------------------------------------------------------------------------------------------------------------------------------------------------------------------------------------------------------------------------------------------------------------------------------------------------------------------------------------------------------------------------------------------------------------------------------------------------------------------------------------------------------------------------------------------------------------|
|                                                                                                                                                                                                       | <p>resource areas. Alternatively, the MBA for dried blood spots (DBS) developed by O’Broin <i>et al.</i> (148, 149) and implemented at the CDC (150) is a suitable tool to assess folate status in a population when no venous sample can be collected. The great sensitivity of the MBA is of particular benefit when only a small sample volume is available, such as for samples collected from a finger-stick or as a DBS. No other type of method has so far been applied successfully to DBS. Concentrations thought to be protective of neural tube birth defects (8, 151, 152) have also been published.</p>                                                                                                                                                                                                                                                                                                                                                                                                                                                                                                                                                                                  |
| <p><b>Research settings</b> (e.g. researchers and educators involved in studies of nutrition/health including development and utilization of biomarkers and training students and research staff)</p> | <p>In research, RBC folate is measured in human participants and animal models to investigate the effects of genetics on folate status and requirements, the effects of other nutrients and diets on folate status, and to study folate bioavailability.</p> <p>RBC folate reflects long-term status (<i>exposure</i>) and has wide utility in the research setting because there are established reference values and cut-offs (<i>status</i>) based on haematological indices (<i>function</i>) published in the folate DRI (16). RBC folate is responsive to folate intake (<i>effect</i>); as a long-term marker of folate status, it is often considered in concert with serum folate, a biomarker that reflects short-term folate status. It is important that interpretation of RBC folate values in research settings fully consider the variety of biological and contextual factors (covered in detail below) that can impact circulating concentrations. RBC total folate is the most widely utilized RBC folate biomarker; however, RBC folate vitamers, including 5-methyltetrahydrofolate and formyl folate (51, 153) are also important folate biomarkers in the research setting.</p> |
| <p><b>Clinical settings</b></p>                                                                                                                                                                       | <p>Folate enters red blood cells as they form in the bone marrow. The concentration is determined by exposure before they are released into the circulation. When RBC folate is measured clinically, it reflects the availability of folate when the circulating red blood cells were developing. Because the life of these cells is approximately 90 to 120 days, measuring red cell folate provides a long term marker of folate status. Thus, it is useful in conjunction with serum folate, a short term marker of folate status. Because vitamin B12 is required for folate retention in developing red blood cells, RBC folate concentrations are dependent on vitamin B12 as well as folate availability and low levels may reflect vitamin B12 deficiency as well as folate deficiency. The same factors that influence serum folate (pregnancy, alcohol, anti-folate drugs, etc.) can influence RBC folate concentrations.</p>                                                                                                                                                                                                                                                               |



## Online Supporting Material

| <b>Biological Factors; impact of the following on interpretation of each biomarker:</b> |                                                                                                                                      |
|-----------------------------------------------------------------------------------------|--------------------------------------------------------------------------------------------------------------------------------------|
| Race/ethnicity                                                                          | See above (serum folate)                                                                                                             |
| Gender                                                                                  | See above (serum folate)                                                                                                             |
| Age-life stage/endocrinology                                                            | See above (serum folate)                                                                                                             |
| Genetics                                                                                | See above (serum folate)                                                                                                             |
| Body mass index                                                                         | See above (serum folate)                                                                                                             |
| Endemic disease (e.g. malaria; HIV)                                                     | See above (serum folate)                                                                                                             |
| Inflammation                                                                            | See above (serum folate)                                                                                                             |
| Non-communicable disease (e.g. cancer)                                                  | See above (serum folate)                                                                                                             |
| Pharmacology (treatment interactions including traditional therapies)                   | See above (serum folate)                                                                                                             |
| Nutrient interactions                                                                   | See Table 12                                                                                                                         |
| <b>Contextual Factors; impact of the following on performance of each biomarker:</b>    |                                                                                                                                      |
| Sample source                                                                           | See above (serum folate)                                                                                                             |
| Bioavailability                                                                         | Red blood cell folate reflects bioavailability if measured longitudinally where long term changes are reflected over several months. |
| Fasting; time of day; time of exposure/meal/intervention                                | See above (serum folate)                                                                                                             |
| Drug use (in context of acute or chronic treatment for disease; recreational)           | See above (serum folate)                                                                                                             |
| Coffee consumption                                                                      | See above (serum folate)                                                                                                             |
| Smoking tobacco                                                                         | See above (serum folate)                                                                                                             |
| Alcohol consumption                                                                     | See above (serum folate)                                                                                                             |
| Exercise                                                                                | See above (serum folate)                                                                                                             |
| Socioeconomic (e.g. education; income)                                                  | See above (serum folate)                                                                                                             |

### **Plasma Homocysteine: General Characteristics**

It has been recommended that Hcy should be measured in plasma because the sample can be processed immediately. To obtain serum, on the other hand, a blood sample has to be left at room temperature for 30-60 min to allow coagulation, which leads to an artificial increase in Hcy due to an ongoing release of Hcy from RBCs. Serum concentrations will therefore be ~5-10% higher than those obtained in optimally prepared plasma (154).

|                                                                                          |                                                                                                                                                                                                                                                                                                                                                                                                                                                                                                                                                                                                                                                                                                                                                                                                                                                                                                                                                                                                                                                                                                                                                                     |
|------------------------------------------------------------------------------------------|---------------------------------------------------------------------------------------------------------------------------------------------------------------------------------------------------------------------------------------------------------------------------------------------------------------------------------------------------------------------------------------------------------------------------------------------------------------------------------------------------------------------------------------------------------------------------------------------------------------------------------------------------------------------------------------------------------------------------------------------------------------------------------------------------------------------------------------------------------------------------------------------------------------------------------------------------------------------------------------------------------------------------------------------------------------------------------------------------------------------------------------------------------------------|
| <p>Humans versus animal models versus cell/molecular studies?</p>                        | <p>Functional biomarkers of folate metabolism, including Hcy concentrations, were shown to vary among 13 different mouse strains (155).<br/>See serum folate (humans versus animal models versus cell/molecular studies) for more information.</p>                                                                                                                                                                                                                                                                                                                                                                                                                                                                                                                                                                                                                                                                                                                                                                                                                                                                                                                  |
| <p>Exposure (short-/long-term?)</p>                                                      | <p>Plasma Hcy decreases at a rapid rate of <math>0.08 \text{ h}^{-1}</math> and reaches a plateau 24 hours after iv administration of high dose 5-formylTHF (156). This is explained by the role of 5-methyl-THF as a methyl donor in the remethylation of Hcy catalyzed by the enzyme methionine synthase (154). Plasma Hcy responds within 3-4 weeks of folate depletion (increases) and subsequent repletion (declines) in healthy subjects (157). The fast response probably reflects that methyl groups for Hcy remethylation are dependent on “shallow” folate pool(s) with a fast turnover rate (158).</p>                                                                                                                                                                                                                                                                                                                                                                                                                                                                                                                                                   |
| <p>Status: are there validated norms to define deficiency/adequacy?</p>                  | <p>A multitude of factors affecting Hcy concentrations complicate the establishment of reference ranges and cut-off levels. Traditionally, Hcy below <math>15 \mu\text{mol/L}</math> was considered as normal, <math>15\text{--}30 \mu\text{mol/L}</math> as moderate hyperhomocysteinemia and <math>&gt;30 \mu\text{mol/L}</math> as severe hyperhomocysteinemia (154, 159). Optimized Hcy in the range <math>5\text{--}10 \mu\text{mol/L}</math> were reported in several studies (160-163).</p> <p>Apart from providing an indication of functional folate deficiency, elevated plasma Hcy concentrations are associated with an increased risk of cardiovascular diseases. The 2009 US National Academy of Clinical Biochemistry (NACB) Laboratory Medicine Practice Guidelines on “Emerging Biomarkers of Cardiovascular Disease and Stroke” categorized Hcy concentrations (<math>\mu\text{mol/L}</math>) derived from standardized assays as follows: desirable <math>\leq 10</math>; intermediate (low to high) <math>&gt;10</math> to <math>&lt;15</math>; high <math>\geq 15</math> to <math>&lt;30</math>; and very high <math>\geq 30</math> (164).</p> |
| <p>Function: does biomarker reflect direct function (e.g, enzyme stimulation assays)</p> | <p>The measurement of plasma Hcy provides a sensitive functional biomarker of folate status. When the status of folate is low or deficient, plasma Hcy is invariably found to be</p>                                                                                                                                                                                                                                                                                                                                                                                                                                                                                                                                                                                                                                                                                                                                                                                                                                                                                                                                                                                |

## Online Supporting Material

|                                                                                                               |                                                                                                                                                                                                                                                                                                                                                                                                                                                                                                                                                                                                                                                                                                                                                                                                                                                                                                                                                                                                                                                                                                                                                                                                                                                                                                                                                                                                                                                                                                                            |
|---------------------------------------------------------------------------------------------------------------|----------------------------------------------------------------------------------------------------------------------------------------------------------------------------------------------------------------------------------------------------------------------------------------------------------------------------------------------------------------------------------------------------------------------------------------------------------------------------------------------------------------------------------------------------------------------------------------------------------------------------------------------------------------------------------------------------------------------------------------------------------------------------------------------------------------------------------------------------------------------------------------------------------------------------------------------------------------------------------------------------------------------------------------------------------------------------------------------------------------------------------------------------------------------------------------------------------------------------------------------------------------------------------------------------------------------------------------------------------------------------------------------------------------------------------------------------------------------------------------------------------------------------|
| <p>or indirectly reflect function of biological systems, (e.g. growth)</p>                                    | <p>elevated. Plasma Hcy will thus be inversely related to folate status in population data (whether measured as serum or RBC folate), and highly responsive to intervention with folate.</p> <p>Plasma Hcy is not however a specific marker of folate status, as it will also be elevated with other B-vitamin deficiencies, lifestyle factors, renal insufficiency and drug treatments (154, 157). Most importantly, Hcy is also an indicator of vitamin B12 status, which is explained by methylcobalamin serving as a co-factor in the methionine synthase reaction which remethylates Hcy to methionine. In population groups that consume folic acid fortified foods or folic acid supplements, Hcy is considered a more reliable biomarker of vitamin B12 status than of folate status (154).</p> <p>Plasma Hcy is an indicator of overall methyl status <i>in vivo</i> and is influenced by several vitamins and methyl donors involved in one-carbon metabolism, including vitamins B2, B6, betaine (and choline), in addition to B12 (165). This is demonstrated by the inverse association between plasma Hcy and serum folate, which is strongest when the other nutrients are low (166, 167). The most important genetic determinant of elevated plasma Hcy in the general population is the 677C&gt;T polymorphism in <i>MTHFR</i>; individuals with the homozygous mutant <i>MTHFR</i> 677TT genotype will typically have significantly higher plasma Hcy compared to those with the CC or CT genotypes.</p> |
| <p>Effect: does the biomarker directly reflect a response to an intervention either positive or negative?</p> | <p>Plasma Hcy decreases in response to intervention with folate, alone or in combination with the other methyl donors involved in one-carbon metabolism: vitamin B12, vitamin B6, vitamin B2 and betaine (or choline).</p> <p>Plasma Hcy was previously reported to decrease in a dose-responsive manner with folic acid supplementation, reaching a maximum reduction of 23% at <math>\geq 800</math> <math>\mu\text{g}/\text{d}</math>, an effect that was most pronounced in subjects with high Hcy and/or low blood folate at baseline (168). More recent evidence however showed that a dose of folic acid as low as 200 <math>\mu\text{g}/\text{d}</math> can, if administered for a prolonged period of 6 months, effectively lower Hcy concentrations regardless of initial plasma Hcy or folate concentrations, suggesting that higher folic acid doses were not necessary (13). Several previous trials probably overestimated the folic acid dose required for maximal lowering of plasma Hcy because of treatment durations that were too short to allow the maximal plasma Hcy response to be observed (168).</p>                                                                                                                                                                                                                                                                                                                                                                                             |

## Online Supporting Material

|                                                                                                                                                                                                                                                                                                                                                                                            |                                                                                                                                                                                                                                                                                                                                                                                                                                                                                                                                                                                                                                                                                                                                                                                                                                                               |
|--------------------------------------------------------------------------------------------------------------------------------------------------------------------------------------------------------------------------------------------------------------------------------------------------------------------------------------------------------------------------------------------|---------------------------------------------------------------------------------------------------------------------------------------------------------------------------------------------------------------------------------------------------------------------------------------------------------------------------------------------------------------------------------------------------------------------------------------------------------------------------------------------------------------------------------------------------------------------------------------------------------------------------------------------------------------------------------------------------------------------------------------------------------------------------------------------------------------------------------------------------------------|
|                                                                                                                                                                                                                                                                                                                                                                                            | <p>Mandatory folic acid fortification implemented in North America in 1998 was associated with a reduction in Hcy of about 7-10% (169, 170). Additional supplementation with folic acid appears to result in a further lowering of Hcy by about 15%, as indicated by intervention trials conducted after the introduction of mandatory folic acid-fortification in North America (171).</p> <p>The plasma Hcy response to folic acid (irrespective of dose or duration of intervention) is however strongly affected by the common 677C&gt;T polymorphism in <i>MTHFR</i>.</p>                                                                                                                                                                                                                                                                                |
| <p><b>User groups considerations for homocysteine with regard to:</b></p>                                                                                                                                                                                                                                                                                                                  |                                                                                                                                                                                                                                                                                                                                                                                                                                                                                                                                                                                                                                                                                                                                                                                                                                                               |
| <p><b>Population</b><br/>(e.g. policy makers assessing status of population; agencies conducting national surveys; agencies responsible for development, implementation, and evaluation of food/nutrient based programs)<br/>Different environment and resources:</p> <ul style="list-style-type: none"> <li>• developed countries</li> <li>• developing-low resource countries</li> </ul> | <p>Theoretically, Hcy is an attractive candidate for population use because it reflects suboptimal levels of one or more B vitamins (folate, B12, B6, or B2) and is considered a functional marker of folate status. If the primary goal is to investigate folate status, however, the effect of other vitamins on Hcy status would be confounding. Moreover, other factors such as renal status, age and sex affect Hcy status as well.</p>                                                                                                                                                                                                                                                                                                                                                                                                                  |
| <p><b>Research settings</b> (e.g. researchers and educators involved in studies of nutrition/health including development and utilization of biomarkers and training students and research staff)</p>                                                                                                                                                                                      | <p>In research, total plasma Hcy is measured in human participants and animal models as a functional marker of folate status, to investigate the effects of genetics on folate function and requirements, and the effects of other nutrients and diets on folate function.</p> <p>Plasma Hcy is a functional biomarker as it is related to methionine cycle activity and methyl group availability (<i>function</i>). There is an inverse relationship between folate intake and plasma Hcy (<i>effect</i>); however, there is a point at which increased folate intake will not continue to lower plasma Hcy (16). Cut-offs indicating elevated plasma Hcy for various populations have been suggested (<i>status</i>) (16, 154). Plasma Hcy is an ancillary indicator of folate status and should be considered in concert with serum and/or RBC folate</p> |

## Online Supporting Material

|                                                                                         |                                                                                                                                                                                                                                                                                                                                                                                                                                                                                                                                                                                                                                                                                                                                                                                                                                                                                                                                                                                                                                                                                                                                                                                                                                                                                                                                                                                                                                                                                                                                                                                               |
|-----------------------------------------------------------------------------------------|-----------------------------------------------------------------------------------------------------------------------------------------------------------------------------------------------------------------------------------------------------------------------------------------------------------------------------------------------------------------------------------------------------------------------------------------------------------------------------------------------------------------------------------------------------------------------------------------------------------------------------------------------------------------------------------------------------------------------------------------------------------------------------------------------------------------------------------------------------------------------------------------------------------------------------------------------------------------------------------------------------------------------------------------------------------------------------------------------------------------------------------------------------------------------------------------------------------------------------------------------------------------------------------------------------------------------------------------------------------------------------------------------------------------------------------------------------------------------------------------------------------------------------------------------------------------------------------------------|
|                                                                                         | concentrations. Biological and contextual factors (covered in detail below) should always be considered in the interpretation of plasma Hcy concentrations.                                                                                                                                                                                                                                                                                                                                                                                                                                                                                                                                                                                                                                                                                                                                                                                                                                                                                                                                                                                                                                                                                                                                                                                                                                                                                                                                                                                                                                   |
| <b>Clinical settings</b>                                                                | <p>Plasma Hcy is a valuable marker of folate status because 5-methylTHF is required to convert Hcy to methionine. It is important to recognize that vitamin B12 is required for this reaction as well; therefore, elevated Hcy concentrations may result from folate deficiency, B12 deficiency, or a combination of the two. It is also important to note that other factors including age, sex, renal function, genetic variants such as <i>MTHFR</i> 677C&gt;T and other vitamin concentrations (B6 and B2) have to be taken into account in interpreting Hcy results. In clinical settings Hcy can be used to confirm a suspected diagnosis of folate deficiency based on low serum folate or red cell folate. Because Hcy may be elevated by either folate or B12 deficiency it is often advisable to include a measure of B12 status when measuring Hcy. MMA is useful because unlike Hcy, it reflects B12, but not folate, status.</p> <p>In the clinical setting, patients with extremely high Hcy (50 - 200 <math>\mu\text{mol/L}</math>) but with normal B-vitamin status and renal function are occasionally encountered. High Hcy could be due to inborn error homocystinuria, which is more common than usually reported (172) and has variable phenotypic expression. Since mutation(s) in cystathionine <math>\beta</math>-synthase, the most common cause of homocystinuria, also causes a substantial increase in plasma methionine (often &gt; 100 <math>\mu\text{mol/L}</math> (173), the combined measurement of plasma Hcy and methionine could be diagnostic (174).</p> |
| <b>Biological Factors; impact of the following on interpretation of each biomarker:</b> |                                                                                                                                                                                                                                                                                                                                                                                                                                                                                                                                                                                                                                                                                                                                                                                                                                                                                                                                                                                                                                                                                                                                                                                                                                                                                                                                                                                                                                                                                                                                                                                               |
| Race/ethnicity                                                                          | Folic acid fortification in the US, enacted in 1998, has markedly improved all markers of folate status across all ethnicities. Comparing data from NHANES III 1988—1994 with NHANES 1999-2000, NHANES 2001-2002 and NHANES 2003-2006, shows a moderate decline in Hcy of 20% post-fortification (26, 27). Notably, both before and after fortification, Non-Hispanic Whites (NHW) had slightly higher Hcy than Mexican Americans (MA). In a recent analysis of NHANES 2003-2006 data, race-ethnic differentials in Hcy remained significant after adjustment for socioeconomic and lifestyle variables (29).                                                                                                                                                                                                                                                                                                                                                                                                                                                                                                                                                                                                                                                                                                                                                                                                                                                                                                                                                                                 |
| Age-life stage/endocrinology                                                            | <u>Age and gender</u> : Folate biomarkers, including Hcy, and their interrelations change markedly from birth to senescence.                                                                                                                                                                                                                                                                                                                                                                                                                                                                                                                                                                                                                                                                                                                                                                                                                                                                                                                                                                                                                                                                                                                                                                                                                                                                                                                                                                                                                                                                  |

## Online Supporting Material

|                                                                                       |                                                                                                                                                                                                                                                                                                                                                                                                                                                                                                                                                                                                                                                                                                                                                                                                                                                                                                                                                                                                                                                                                                                                                                                                                                                                                                                                                                                                                                                                                                                                                                                                                                                                                                                                                                                                                                                                                                                                                                                                                                                                                                                                                                                                                                                                                                                                                                                                                                                                          |
|---------------------------------------------------------------------------------------|--------------------------------------------------------------------------------------------------------------------------------------------------------------------------------------------------------------------------------------------------------------------------------------------------------------------------------------------------------------------------------------------------------------------------------------------------------------------------------------------------------------------------------------------------------------------------------------------------------------------------------------------------------------------------------------------------------------------------------------------------------------------------------------------------------------------------------------------------------------------------------------------------------------------------------------------------------------------------------------------------------------------------------------------------------------------------------------------------------------------------------------------------------------------------------------------------------------------------------------------------------------------------------------------------------------------------------------------------------------------------------------------------------------------------------------------------------------------------------------------------------------------------------------------------------------------------------------------------------------------------------------------------------------------------------------------------------------------------------------------------------------------------------------------------------------------------------------------------------------------------------------------------------------------------------------------------------------------------------------------------------------------------------------------------------------------------------------------------------------------------------------------------------------------------------------------------------------------------------------------------------------------------------------------------------------------------------------------------------------------------------------------------------------------------------------------------------------------------|
| <p>(infants/children; adolescents; women of reproductive age; pregnancy; elderly)</p> | <p>Infants (&lt; 1 year of age) have a relatively high Hcy (~ 7 <math>\mu\text{mol/L}</math>) (30) which declines markedly after one year of age. No differences in folate biomarkers were observed between girls and boys aged &lt; 15 years (31-34), but in older age groups (32), males attained a higher Hcy than females (26, 27, 130). The lowest values for Hcy (~5.5 <math>\mu\text{mol/L}</math>) were observed in the age range of 1 - 10 years (26, 30). Thereafter, the biomarker increased in both genders (26).</p> <p>Notably, in infants cobalamin rather than folate status predicts Hcy (34, 42), and high serum folate is attributed to methyl folate trapping as demonstrated by reduction of both Hcy and serum folate following cobalamin supplementation (34). In children and adolescents, folate becomes a stronger predictor of Hcy than cobalamin (33), whereas in the elderly (&gt; 60 years) Hcy correlates more strongly with cobalamin than with folate (6, 175), in particular when including subjects taking supplements (176).</p> <p><u>Pregnancy:</u> Plasma Hcy is relatively low in fertile women with mean preconceptional plasma levels of about 8.5 <math>\mu\text{mol/L}</math>. It declines within 8 weeks of pregnancy, reaches a nadir corresponding to about 30% decline during the second trimester and thereafter approaches preconceptional levels at labor. The decline is not offset by folic acid intake (43) but is less pronounced in supplement users than non-users (177). A between-subject variability, however, is maintained throughout pregnancy with strong to moderate correlations of Hcy during pregnancy with preconceptional levels (r of 0.71(gw 8) to 0.54 (gw 32)) (177).</p> <p><u>Oral contraceptives:</u> Relatively low Hcy has been consistently demonstrated in women on estrogen replacement therapy (178). It has been concluded that higher estrogen status is associated with decreased Hcy, independent of nutritional status and muscle mass, and probably reflects hormonal effects on Hcy metabolizing enzymes (179).</p> <p><u>Male sex hormones:</u> Plasma Hcy is higher in men than in women, and higher in women with polycystic ovary syndrome (characterized by androgen excess) than controls; however, Hcy shows no relation with circulating levels of testosterone or dehydroepiandrosterone in middle aged men in a study adjusting for potential confounders (180).</p> |
| <p>Genetics</p>                                                                       | <p>There are consistent results demonstrating that Hcy increases and serum folate decreases in a dose-response manner according to the number of <i>MTHFR</i> 677-T alleles. These effects are most pronounced in subjects/populations with low</p>                                                                                                                                                                                                                                                                                                                                                                                                                                                                                                                                                                                                                                                                                                                                                                                                                                                                                                                                                                                                                                                                                                                                                                                                                                                                                                                                                                                                                                                                                                                                                                                                                                                                                                                                                                                                                                                                                                                                                                                                                                                                                                                                                                                                                      |

## Online Supporting Material

|                                     |                                                                                                                                                                                                                                                                                                                                                                                                                                                                                                                                                                                                                                                                                                                                                                                                                                                                                                                                   |
|-------------------------------------|-----------------------------------------------------------------------------------------------------------------------------------------------------------------------------------------------------------------------------------------------------------------------------------------------------------------------------------------------------------------------------------------------------------------------------------------------------------------------------------------------------------------------------------------------------------------------------------------------------------------------------------------------------------------------------------------------------------------------------------------------------------------------------------------------------------------------------------------------------------------------------------------------------------------------------------|
|                                     | <p>folate status, and the inverse association between Hcy and serum folate is strongest in subjects with the TT genotype (50). In the prefortification US population (NHANES III), plasma Hcy was about 25% higher (54) in subjects with the TT genotype compared with the CC genotype; the Hcy difference was only moderately reduced by supplementation with &gt; 400 µg/d of folic acid or moderate intake of folic acid (55). Plasma Hcy is higher in Asia and Europe as compared to the US and ANZ (54).</p> <p>In the prefortification US population, differences in Hcy by <i>MTHFR</i> 677C-&gt;T genotype were noted for all race-ethnicity groups, with Hcy values lower among NHB (40%), NHW (26%) and MA (21%) of the TT as compared with the CT genotype (55).</p> <p>See Table 12 for a description of the impact of poor riboflavin status on plasma Hcy in individuals with the <i>MTHFR</i> 677 TT genotype.</p> |
| Body mass index                     | Hcy shows no relation with BMI in most (60, 62, 181, 182) but not all studies (59).                                                                                                                                                                                                                                                                                                                                                                                                                                                                                                                                                                                                                                                                                                                                                                                                                                               |
| Endemic disease (e.g. malaria; HIV) | <p><u>Malaria:</u> Plasma Hcy has been reported to be normal in some studies on malarial infections (68, 183), but elevated in one study on acute malaria (184). In the latter study, hyperhomocysteinemia was associated with disease severity and attributed to oxidative stress (184).</p> <p><u>HIV/AIDS:</u> There are several studies on Hcy in HIV-infected patients, but the results are inconsistent (185, 186). In a recent study (187) the authors conclude that HIV and combination antiretroviral therapy (cART) do not influence the levels of Hcy; main determinants of hyperhomocysteinemia are deficiencies of folate and/or cobalamin (186, 187), and elevated Hcy may be effectively treated by B-vitamins (70).</p>                                                                                                                                                                                           |
| Inflammation                        | <p>Plasma Hcy is not related to CRP and other inflammatory markers in healthy middle aged subjects in the ARIC study (76) or to inflammation (as assessed by CRP) in participants from the population-based Framingham Heart Study cohort (77). Cardiovascular patients with high Hcy have higher levels of some inflammatory markers than patients with low Hcy, but CRP did not differ between the groups (188).</p> <p>Plasma Hcy shows a moderate to strong positive association with markers of cellular Th1 immune activation, like neopterin and the kynurenine/tryptophan ratio. Such associations have been observed in the elderly (189), in patients with rheumatoid</p>                                                                                                                                                                                                                                               |

## Online Supporting Material

|         |                                                                                                                                                                                                                                                                                                                                                                                                                                                                                                                                                                                                                                                                                                                                                                                                                                                                                                                                                                                                                                                                                                                                                                                                                                                                                                                                                                                                                                                                                                                                                                                                                                                                                                                                                                                                                                                                                                                                                                                                                                                                                                                                                                                                                                                                                                                                                                                                                                           |
|---------|-------------------------------------------------------------------------------------------------------------------------------------------------------------------------------------------------------------------------------------------------------------------------------------------------------------------------------------------------------------------------------------------------------------------------------------------------------------------------------------------------------------------------------------------------------------------------------------------------------------------------------------------------------------------------------------------------------------------------------------------------------------------------------------------------------------------------------------------------------------------------------------------------------------------------------------------------------------------------------------------------------------------------------------------------------------------------------------------------------------------------------------------------------------------------------------------------------------------------------------------------------------------------------------------------------------------------------------------------------------------------------------------------------------------------------------------------------------------------------------------------------------------------------------------------------------------------------------------------------------------------------------------------------------------------------------------------------------------------------------------------------------------------------------------------------------------------------------------------------------------------------------------------------------------------------------------------------------------------------------------------------------------------------------------------------------------------------------------------------------------------------------------------------------------------------------------------------------------------------------------------------------------------------------------------------------------------------------------------------------------------------------------------------------------------------------------|
|         | <p>arthritis (190), cardiovascular disease (191) and cancer (192). But the associations may reflect development of hyperhomocysteinemia as a consequence of immune activation rather than impaired folate status (191).</p>                                                                                                                                                                                                                                                                                                                                                                                                                                                                                                                                                                                                                                                                                                                                                                                                                                                                                                                                                                                                                                                                                                                                                                                                                                                                                                                                                                                                                                                                                                                                                                                                                                                                                                                                                                                                                                                                                                                                                                                                                                                                                                                                                                                                               |
| Disease | <p><u>Cancer</u>: Patients with established cancer, particularly at advanced stages may have high Hcy (82, 83). The mechanisms involved may include increased folate requirements due to accelerated DNA synthesis, increased folate catabolism by cancer cells (45, 83) and antifolate chemotherapy (82), (84).</p> <p><u>Psoriasis</u>: Patients with psoriasis have higher Hcy than healthy controls. Concentrations of Hcy are related to disease severity but also to low folate levels in psoriatics (86).</p> <p><u>Inflammatory bowel disease</u>: A recent metaanalysis demonstrated a substantially higher Hcy in patients with inflammatory bowel disease than controls, but with no differences between patients with ulcerative colitis versus Crohn's disease (193). Hyperhomocysteinemia is associated with impaired folate and cobalamin status, erythrocyte sedimentation rate and disease severity (193). Notably, it has been recommended that low circulating folate in IBD should be confirmed by Hcy measurement, regarded as a more sensitive test in these patients (88).</p> <p><u>Sickle cell disease (SCD)</u>: Elevated Hcy (91, 92, 194, 195), (93) has been reported in SCD in most but not all studies (92). As RBC folate does not seem to be an adequate measure of folate status in SCD patients, serum folate and Hcy have been recommended for assessment of folate status in these patients (94). However, there have been uncertainties whether elevated Hcy reflects impaired folate status in SCD patients (93, 195). In a large study including 90 adult patients and 76 controls, creatinine rather than folate was a significant predictor of hyperhomocysteinemia (93).</p> <p><u>Thyroid Disease</u>: Hcy status changes according to thyroid state. Hypothyroid patients have elevated Hcy, whereas hyperthyroid patients have low Hcy (95-97). These changes have been documented in longitudinal studies of patients during treatment, which normalizes thyroid state (95, 98-100). Renal function and folate status are both determinants of plasma Hcy in studies of thyroid patients (99-101, 196), suggesting that changes in folate status cannot be followed by measuring Hcy.</p> <p><u>Diabetes</u>: In diabetics, serum or RBC folate and kidney function are determinants of Hcy (106, 197), but in some studies renal function is the strongest or sole determinant (198),</p> |



## Online Supporting Material

|                                                                                      |                                                                                                                                                                                                                                                                                                                                                                                                                                                                                                                                                                                                                                                                                                                                                                                                                                                                                                                                                                                                                                                                                                                                                                                                                                                                                                                                                                                                                                                                                                                                                                                                                                                                            |
|--------------------------------------------------------------------------------------|----------------------------------------------------------------------------------------------------------------------------------------------------------------------------------------------------------------------------------------------------------------------------------------------------------------------------------------------------------------------------------------------------------------------------------------------------------------------------------------------------------------------------------------------------------------------------------------------------------------------------------------------------------------------------------------------------------------------------------------------------------------------------------------------------------------------------------------------------------------------------------------------------------------------------------------------------------------------------------------------------------------------------------------------------------------------------------------------------------------------------------------------------------------------------------------------------------------------------------------------------------------------------------------------------------------------------------------------------------------------------------------------------------------------------------------------------------------------------------------------------------------------------------------------------------------------------------------------------------------------------------------------------------------------------|
|                                                                                      | <p>in particular when renal dysfunction evolves (103). In diabetics (type I and II) with no complications, Hcy is lower than in healthy controls, which has been explained by hyperfiltration and hormonal effects on Hcy metabolizing enzymes (197, 199, 200). Likewise, insulin and hyperinsulinism decrease whereas insulin resistance (in type II diabetes) increases plasma Hcy (201).</p> <p><i>Kidney Disease/ Renal failure:</i> Hyperhomocysteinemia is observed in patients with nephropathy (201), which can be explained by impaired Hcy metabolism in kidney and liver (200). Plasma Hcy is markedly elevated even in mild renal impairment (111, 112), and there is an inverse association between Hcy and glomerular filtration rate (GFR) across the whole range of GFR values from above normal (as in early diabetes with hyperfiltration) to low GFR (renal dysfunction) (197), (203). Treatment of renal patients with folic acid normalizes circulating folate and also lowers (by about 30%), but does not normalize, Hcy (204). Higher (<math>\geq 2.5</math> mg/d) than the standard folic acid dose (0.4 mg/d) effective in healthy subjects are required (205, 206) to normalize Hcy in these patients. In renal patients Hcy shows a strong, inverse association with serum and RBC folate even in folate replete patients treated with folic acid (207, 208). These observations suggest impaired folate function in renal patients, who might require larger folate intake than healthy subjects. In addition to folate inadequacy, hyperhomocysteinemia may reflect reduced renal clearance of Hcy and impaired Hcy remethylation (209).</p> |
| Pharmacology (treatment interactions including traditional therapies)                | Some drugs have a negative effect on folate status and thereby increase plasma Hcy, but other drugs affect plasma Hcy by mechanisms independent of folate. See: Drug Use – below.                                                                                                                                                                                                                                                                                                                                                                                                                                                                                                                                                                                                                                                                                                                                                                                                                                                                                                                                                                                                                                                                                                                                                                                                                                                                                                                                                                                                                                                                                          |
| <b>Contextual Factors; impact of the following on performance of each biomarker:</b> |                                                                                                                                                                                                                                                                                                                                                                                                                                                                                                                                                                                                                                                                                                                                                                                                                                                                                                                                                                                                                                                                                                                                                                                                                                                                                                                                                                                                                                                                                                                                                                                                                                                                            |
| Sample source                                                                        | EDTA plasma is preferred over serum for Hcy analysis because the vacutainer can be immediately centrifuged.                                                                                                                                                                                                                                                                                                                                                                                                                                                                                                                                                                                                                                                                                                                                                                                                                                                                                                                                                                                                                                                                                                                                                                                                                                                                                                                                                                                                                                                                                                                                                                |
| Fasting; time of day; time of exposure/meal/intervention                             | <p>Fasting is generally not required (154); however, variations in Hcy concentrations have been observed in response to a high protein meal (210).</p> <p>The variability of plasma Hcy in healthy subjects (n=96) aged 65-75 years over a 1 year period was investigated 15 years ago (210). The reliability was found to be excellent with an (adjusted) ICC of 0.88. Recent assessments of within-subject stability of plasma Hcy in 40 Nurses' Health Study (NHS) participants over 1 -2 years and in 551 patients with stable</p>                                                                                                                                                                                                                                                                                                                                                                                                                                                                                                                                                                                                                                                                                                                                                                                                                                                                                                                                                                                                                                                                                                                                     |

|                                                                                      |                                                                                                                                                                                                                                                                                                                                                                                                                                                                                                                                                                                                                                                                                                                                                                                                                                                                                                                                                                                                                                                                                                                                                                                                                                                                                                                                                                                                                                                                                                                                                                                                                                                                                                                                                                                                                                                                                                                                                                                                                                                                                                                                                                                                                                                                                                                                                                                                                            |
|--------------------------------------------------------------------------------------|----------------------------------------------------------------------------------------------------------------------------------------------------------------------------------------------------------------------------------------------------------------------------------------------------------------------------------------------------------------------------------------------------------------------------------------------------------------------------------------------------------------------------------------------------------------------------------------------------------------------------------------------------------------------------------------------------------------------------------------------------------------------------------------------------------------------------------------------------------------------------------------------------------------------------------------------------------------------------------------------------------------------------------------------------------------------------------------------------------------------------------------------------------------------------------------------------------------------------------------------------------------------------------------------------------------------------------------------------------------------------------------------------------------------------------------------------------------------------------------------------------------------------------------------------------------------------------------------------------------------------------------------------------------------------------------------------------------------------------------------------------------------------------------------------------------------------------------------------------------------------------------------------------------------------------------------------------------------------------------------------------------------------------------------------------------------------------------------------------------------------------------------------------------------------------------------------------------------------------------------------------------------------------------------------------------------------------------------------------------------------------------------------------------------------|
|                                                                                      | <p>angina pectoris from the WENBIT study over 3.5 years demonstrated a somewhat lower but still good reproducibility (ICCs of 0.71 and 0.73, respectively) (117). The reproducibility of plasma Hcy over time allows one-exposure assessment of biomarker status.</p>                                                                                                                                                                                                                                                                                                                                                                                                                                                                                                                                                                                                                                                                                                                                                                                                                                                                                                                                                                                                                                                                                                                                                                                                                                                                                                                                                                                                                                                                                                                                                                                                                                                                                                                                                                                                                                                                                                                                                                                                                                                                                                                                                      |
| <p>Drug use (in context of acute or chronic treatment for disease; recreational)</p> | <p><i>Lipid-lowering drugs:</i> Marked elevations of Hcy by 20-50% are observed in patients treated with fibric acid derivatives, like fenofibrate and bezafibrate. Folate and vitamin B12 are not affected. Suggested mechanisms involve enhanced creatine synthesis, renal cyclooxygenase (COX-2) down-regulation and PPAR<math>\alpha</math> activation (124). There is some evidence that nicotinic acid (niacin) moderately increases Hcy, probably by enhanced S-adenosylhomocysteine production during methylation of nicotinamide. HMG-CoA reductase inhibitors have essentially no effect on plasma Hcy (124, 212).</p> <p><i>Antihypertensive drugs:</i> Therapy with diuretics including hydrochlorothiazid is associated with decreased circulating folate and elevated Hcy. The underlying mechanisms may involve folate depletion and impaired renal function (124). In contrast, beta blockers seem to reduce Hcy in hypertensive patients by unknown mechanisms (124).</p> <p><i>Vitamin B6 and cobalamin antagonists:</i> Elevated levels of Hcy have been reported in subjects treated with azauridine, isoniazid and theophylline (213). These drugs are inhibitors of the enzyme pyridoxal kinase and thereby may interfere with vitamin B6 function.</p> <p>Plasma Hcy increases within hours in patients exposed to the anaesthetic gas, nitrous oxide, which is explained by oxidation of cobalamin bound to methionine synthase. Inhibition of the enzyme leads to a 5-methyltetrahydrofolate trap and thereby a transient increase in serum folate (214). A slow increase in Hcy over months reflecting cobalamin deficiency is observed in patients treated with drugs interfering with cobalamin absorption, which include H<sub>2</sub>-receptor antagonists (215), proton-pump inhibitors (216) and metformin (201, 217, 218).</p> <p><i>Others:</i> Parkinson patients treated with levodopa are at increased risk of elevated Hcy as a consequence of levodopa methylation by catechol-O-methyltransferase (COMT). Accordingly, the ensuing hyperhomocysteinemia is prevented by peripherally acting COMT inhibitors (212, 219).</p> <p>The immunosuppressive drug cyclosporine A (CyA) seems to increase plasma Hcy (213, 220), probably by its adverse effect on renal function, which may be difficult to distinguish from renal impairment from other causes in (cardiac and renal)</p> |

## Online Supporting Material

|                     |                                                                                                                                                                                                                                                                                                                                                                                                                                                                                                                                                                                                                                                                                                                                                                                                                                                                                                                                                                                                                                                           |
|---------------------|-----------------------------------------------------------------------------------------------------------------------------------------------------------------------------------------------------------------------------------------------------------------------------------------------------------------------------------------------------------------------------------------------------------------------------------------------------------------------------------------------------------------------------------------------------------------------------------------------------------------------------------------------------------------------------------------------------------------------------------------------------------------------------------------------------------------------------------------------------------------------------------------------------------------------------------------------------------------------------------------------------------------------------------------------------------|
|                     | transplant recipients (221).                                                                                                                                                                                                                                                                                                                                                                                                                                                                                                                                                                                                                                                                                                                                                                                                                                                                                                                                                                                                                              |
| Coffee consumption  | Coffee consumption is a strong determinant of plasma Hcy, which shows a dose-response relationship with coffee intake. This relationship is observed for filtered coffee, boiled coffee but not for decaffeinated coffee, in smokers and non-smokers, and is only slightly attenuated after adjustment for vitamin intake (129, 222). The increase in Hcy is paralleled by a decrease in plasma folate (126, 127), but also a decrease in vitamin B6 and riboflavin (but not vitamin B12) (127). Thus, coffee drinkers have higher mean Hcy and lower mean folate than non-drinkers, but the differences are only observed at the lower end of the Hcy distribution (129) and at the higher end of the folate distribution (127, 128). It seems that plasma folate (127) and caffeine (223) are main determinants of Hcy. Possible mechanisms involved are increased renal excretion of folate (at high plasma folate) mediated by caffeine (127) and metabolism of chlorogenic acid in coffee by methylation, leading to increased Hcy production (224). |
| Smoking tobacco     | Smoking is associated with deficiencies of several micronutrients and B-vitamins, including folate. Smokers have lower RBC and plasma/serum folate and higher Hcy than non-smoker (130, 131), and Hcy shows a positive association with cotinine, a marker of tobacco exposure, in passive smokers (225). Folate and Hcy status improve somewhat within days of smoking cessation, but there is a long-term effect in ex-smokers lasting for years with ex-smokers having lower folate and higher Hcy than never smokers (132). It has been suggested that the acute effect of smoking is related to increased folate breakdown or utilization caused by toxic (prooxidant) chemicals, which is in agreement with persistence of low folate after adjustment for dietary intake. The chronic effect may be explained by imprudent dietary habits of ex-smokers in combination with the time required to replenish folate stores (132).                                                                                                                    |
| Alcohol consumption | The association between Hcy status and alcohol intake is inconsistent, complex and related to type and amount of alcohol. Intake of beer and to a lesser extent wine may be inversely related to Hcy, which may partly be related to vitamin content in beer (128). Intake of liquor shows a positive association with Hcy (222). However, these associations could be confounded by nutrition and lifestyle factors. In a controlled intervention study, 2 weeks with red wine or vodka (24 g ethanol daily) decreased serum folate and increased Hcy (133). Excessive alcohol intake or alcoholism                                                                                                                                                                                                                                                                                                                                                                                                                                                      |

## Online Supporting Material

|                                        |                                                                                                                                                                                                                                                                                                                                                                                                                                                                                                                                                                                                                                 |
|----------------------------------------|---------------------------------------------------------------------------------------------------------------------------------------------------------------------------------------------------------------------------------------------------------------------------------------------------------------------------------------------------------------------------------------------------------------------------------------------------------------------------------------------------------------------------------------------------------------------------------------------------------------------------------|
|                                        | is associated with Hcy concentrations twice normal, which are normalized in abstinent alcoholics (135). Thus, a J-shaped association between alcohol intake and Hcy seems to exist. The ethanol related folate-deficiency has been explained by low intake, malabsorption, altered liver metabolism, increased catabolism and renal excretion of folate (45, 135).                                                                                                                                                                                                                                                              |
| Exercise                               | More than 15 years ago, Nygard et al. (226) reported an overall inverse association between exercise in leisure time and plasma Hcy in a large epidemiological study of about 16000 men and women. Physical activity is associated with several potential confounders, including nutritional and life-style factors and physiological and metabolic changes, and cross sectional and intervention studies (137) on exercise and Hcy have provided inconsistent results (227). Thus, from published results one cannot conclude that physical exercise has a direct effect on biomarkers of folate status, including plasma Hcy. |
| Socioeconomic (e.g. education; income) | In a recent analysis of data from NHANES 2003-2006, the socioeconomic variables of education and family poverty-income ratio were significantly associated with Hcy, however they did not account for much of the variability in biomarker concentration (29).                                                                                                                                                                                                                                                                                                                                                                  |

**Biomarker utility of serum folic acid concentration:**

Depending on the research question, unmetabolized folic acid in serum or plasma may be considered an exposure, status, functional, and/or effect folate biomarker.

|                  |                                                                                                                                                                                                                                                                                                                                                                                                                                                                                           |
|------------------|-------------------------------------------------------------------------------------------------------------------------------------------------------------------------------------------------------------------------------------------------------------------------------------------------------------------------------------------------------------------------------------------------------------------------------------------------------------------------------------------|
| <i>Exposure:</i> | The appearance and quantity of unmetabolized folic acid in circulation has been associated with folic acid exposure via fortified foods, dietary supplements, and a combination of both (22, 23, 228).                                                                                                                                                                                                                                                                                    |
| <i>Status:</i>   | There are no concentration cut-offs for unmetabolized folic acid in blood; however, in the research setting, cases are often grouped and analyzed as those without detectable unmetabolized folic acid versus those with detectable folic acid in circulation. In addition, greater concentrations of unmetabolized folic acid are associated with higher serum folate concentrations (20, 23), suggesting that the amount of folic acid in blood is related to whole body folate status. |
| <i>Function:</i> | Dihydrofolate reductase enzyme activity is variable (25), thus unmetabolized folic acid in blood may also be considered a                                                                                                                                                                                                                                                                                                                                                                 |

## Online Supporting Material

|                                                  |                                                                                                                                                                                                                                                                                                                                                                                                                                                                                                                                                                                                                                                                                                                                                          |
|--------------------------------------------------|----------------------------------------------------------------------------------------------------------------------------------------------------------------------------------------------------------------------------------------------------------------------------------------------------------------------------------------------------------------------------------------------------------------------------------------------------------------------------------------------------------------------------------------------------------------------------------------------------------------------------------------------------------------------------------------------------------------------------------------------------------|
|                                                  | functional indicator of the body's ability to metabolize folic acid to a coenzymatic form.                                                                                                                                                                                                                                                                                                                                                                                                                                                                                                                                                                                                                                                               |
| <i>Effect:</i>                                   | With bolus doses above 200 µg, which appear to exceed the capacity of the dihydrofolate reductase enzyme to reduce FA during intestinal absorption to the bioactive folate vitamer THF, unmetabolized folic acid appears in post-prandial circulation (229). Ingestion of folic acid, either by consumption of fortified foods or dietary supplements, increases the prevalence of detectable unmetabolized folic acid in blood (22, 228). However, there is large variation in folic acid concentrations and the dose response relationship between folic acid exposure and unmetabolized folic acid in circulation is not entirely clear. Any effect of unmetabolized folic acid in blood on cellular function and/or health remains to be elucidated. |
| <b><i>Biological and contextual factors:</i></b> |                                                                                                                                                                                                                                                                                                                                                                                                                                                                                                                                                                                                                                                                                                                                                          |
| <i>Genetics</i>                                  | Genetic variation in dihydrofolate reductase is a biological factor that may contribute to the variation in unmetabolized folic acid concentrations (24, 25).                                                                                                                                                                                                                                                                                                                                                                                                                                                                                                                                                                                            |
| <i>Fasted vs. non-fasted blood collection</i>    | As with serum folate concentrations, fasted versus non-fasted blood collection is an important contextual factor in the interpretation of unmetabolized folic acid concentrations.                                                                                                                                                                                                                                                                                                                                                                                                                                                                                                                                                                       |

**Biomarker utility of urinary folate/folic acid concentration:**

Intact 24-hour urinary folate excretion is not a commonly utilized folate biomarker; however, in research settings it can provide unique information about folate status and metabolism when used in concert with serum and/or RBC folate levels.

|                  |                                                                                                                                                                                                                                                                                                                                                                             |
|------------------|-----------------------------------------------------------------------------------------------------------------------------------------------------------------------------------------------------------------------------------------------------------------------------------------------------------------------------------------------------------------------------|
| <i>Exposure:</i> | Twenty-four hour urinary folate excretion captures the rise and fall of circulating folate concentrations in response to feeding and fasting and thus may be considered an indicator of "average" folate exposure and status over that 24-hour period (18). This is in contrast to serum folate concentration which reflects a single time point on the 24-h kinetic curve. |
| <i>Status:</i>   | There are not validated norms to define deficiency/adequacy; however, historical/pre-fortification levels published in the folate DRI (16) can be used for comparison in assessing exposure and bodily folate stores.                                                                                                                                                       |
| <i>Function:</i> | Folate is reabsorbed from the kidney filtrate; however, the process is saturable, thus, intact urinary folate excretion is a                                                                                                                                                                                                                                                |

## Online Supporting Material

|                           |                                                                                                                                                                                                                                                                                                                                                                                                                                                                                                                                                                     |
|---------------------------|---------------------------------------------------------------------------------------------------------------------------------------------------------------------------------------------------------------------------------------------------------------------------------------------------------------------------------------------------------------------------------------------------------------------------------------------------------------------------------------------------------------------------------------------------------------------|
|                           | functional indicator that the folate concentration of the filtrate exceeded this capacity (230). Similarly, excretion of unmetabolized folic acid may be a functional indicator that the capacity of DHFR to reduce folic acid to a physiologic form was exceeded.                                                                                                                                                                                                                                                                                                  |
| <i>Effect:</i>            | Urinary folate excretion is responsive to folate intake (231, 232); however, intact urinary folate excretion exhibits a large degree of inter- and intra-individual variability (233).                                                                                                                                                                                                                                                                                                                                                                              |
| <i>Biological factors</i> | Although less explored, biological factors that impact serum folate likely affect urinary folate excretion as urinary folate is folate which is filtered from blood. Specifically, pregnancy (18, 234) and race/ethnicity (28) have been shown to affect urinary folate excretion.                                                                                                                                                                                                                                                                                  |
| <i>Contextual factors</i> | Study design and methods as well as companion folate biomarkers (i.e. serum and RBC folate), are important in the interpretation of urinary folate. Urinary folate excretion as a folate biomarker is most useful when folate intake is known or controlled. Incomplete or improper 24-hour urine collection by study participants is of concern and can be corrected with measurements of urinary creatinine. In the quantification of urinary folate, the large variation in collection volumes and concentrations may present challenges for method development. |

**Biomarker utility of urinary and serum pABG and apABG:**

The oxidative folate catabolites *p*-aminobenzoylglutamate (pABG) and *p*-acetamidobenzoylglutamate (apABG) are biomarkers of folate status and turnover. While pABG and apABG are found in blood, urinary pABG and apABG are studied most often.

|                |                                                                                                                                                                                                                                                                                                                                                                                                                                                                                                                                                                                                             |
|----------------|-------------------------------------------------------------------------------------------------------------------------------------------------------------------------------------------------------------------------------------------------------------------------------------------------------------------------------------------------------------------------------------------------------------------------------------------------------------------------------------------------------------------------------------------------------------------------------------------------------------|
| <i>Status:</i> | <p>Total urinary catabolite excretion (i.e. pABG plus apABG) is positively correlated with serum total folate and RBC folate and negatively correlated with plasma Hcy (235). Similarly, pABG and apABG in serum are positively correlated with serum total folate concentrations (21).</p> <p>But these catabolites have high renal clearance, and their serum levels increase up to 30-fold in patients with impaired renal function (21). In contrast, urinary excretion of catabolites reflect net production rate, and are most likely not influenced by renal function, unless severely impaired.</p> |
|----------------|-------------------------------------------------------------------------------------------------------------------------------------------------------------------------------------------------------------------------------------------------------------------------------------------------------------------------------------------------------------------------------------------------------------------------------------------------------------------------------------------------------------------------------------------------------------------------------------------------------------|

## Online Supporting Material

|                                          |                                                                                                                                                                                                                                                              |
|------------------------------------------|--------------------------------------------------------------------------------------------------------------------------------------------------------------------------------------------------------------------------------------------------------------|
| <i>Exposure:</i>                         | Urinary pABG and apABG reflect turnover in endogenous folate pools rather than excretion of ingested pABG (236).                                                                                                                                             |
| <i>Function:</i>                         | Folate catabolism and excretion represent an obligatory route of folate loss (237). Importantly, the quantity of urinary pABG and apABG are related to the size and turn-over rates of body folate pools which is unique among folate biomarkers (235, 238). |
| <i>Effect:</i>                           | Urinary excretion of pABG and apABG is positively associated with folate intake (235); however, it is not as sensitive to folate intake as urinary folate excretion (239), serum folate (238), and plasma Hcy (238).                                         |
| <i>Biological and contextual factors</i> |                                                                                                                                                                                                                                                              |
| <i>Pregnancy</i>                         | Pregnancy is an important biological factor that may alter the rate of folate catabolism, and therefore concentrations of urinary pABG and apABG (240-242).                                                                                                  |
| <i>Ferritin</i>                          | The iron storage protein ferritin catalyzes the oxidation of 5-formyltetrahydrofolate, thus biological states that impact ferritin concentrations may also effect folate catabolism, production of pABG and apABG, and folate status (243).                  |
| <i>Other</i>                             | Additional biological and contextual factors that may also increase folate catabolism include cancer and anticonvulsant and contraceptive drug use (45).                                                                                                     |

## Supplemental Table 2

### Nutrient Review Outline

- I. Background about the Nutrient
  - Historical overview
  - Exposure: food sources
  - Public Health significance: including major causes of deficiency/excess
  - Current guidelines for use
  
- II. Biology of the Nutrient
  - Current understanding of the biology: dependent systems
  - Homeostatic controls/metabolism including nutrient/nutrient interactions
  - Role in health and disease
  
- III. Currently Available Biomarkers: Overview
  - Exposure
  - Status: current cut-offs, how to derive at them and relevance to global/population/individuals
  - Function:
    - direct: biomarkers of function of the micronutrients within relevant biological systems;
    - indirect: surrogate markers of function
  - Effect: markers that respond to intervention (supplement and/or food based)
  
- IV. Biomarker Specific issues: for each biomarker listed in III address:
  - Humans versus animal models versus cell/molecular studies?
    - Exposure (short-/long-term?)
    - Status: are there validated norms to define deficiency/adequacy?
    - Function: do biomarkers reflect direct function, e.g, enzyme stimulation assays or indirectly reflect function of biological systems, e.g., vision, cognition/behavior, growth, immune-competence?
    - Effect: are there markers that directly reflect a response to an intervention either positive or negative?
    - Need for use of surrogate markers of all of the above?
  
  - Population: considerations for each biomarker with regard to:



## Online Supporting Material

- Environment: low/middle income, food insecure etc.
- Life stage/gender considerations
- Health considerations: prevalence of infection, NCDs
- Confounders; impact of the following on performance of each biomarker
  - Bioavailability (in case of use in context of exposure)
  - Time of day/time of exposure/meal/intervention
  - Inflammation
  - Sample source (urine, plasma/serum, RBC etc.)
  - Loss (excretion, secretion etc.),
  - Endocrinology (life stage, stress etc.),
  - Pharmacology (treatment interactions including traditional therapies)
  - Nutrient interactions

### V. Assay specific queries

Once a candidate is identified based on the above questions, specific details regarding the assay, methods and technology requirements would be provided to the user.

- Specificity/Sensitivity
- Multiple use? (e.g, can it reflect exposure, status, function, effect?)
- Sample collection considerations
- Optimal cut-off points
- Life stage sensitivity?
  - Infants/Children
  - Adolescents
  - Women of reproductive age
  - Pregnancy
  - Elderly
- Laboratory methodology
  - Reagents
  - Laboratory conditions (temp/humidity etc)
  - Equipment
- Field applicability (technical requirements, capacity/resource needs etc.)
- Interpretation in

## Online Supporting Material

- Isolated nutritional deficiency
- The setting of endemic disease, e.g., malaria
- Interpretation in the presence of other infections/conditions
- Utility for targeting interventions

VI. New Direction/technologies: “omics” etc.

VII. Research Gaps/Needs

VIII. Conclusions

## Supplemental Literature Cited

1. Van Allen MI. Multisite neural tube closure in humans. *Birth Defects Orig Artic Ser* 1996; 30(1): 203-25.
2. Fox JT, Stover PJ. Folate-mediated one-carbon metabolism. *Vitam Horm* 2008; 79: 1-44.
3. van der Wilt CL, Backus HH, Smid K, Comijn L, Veerman G, Wouters D, Voorn DA, Priest DG, Bunni MA, Mitchell F, et al. Modulation of both endogenous folates and thymidine enhance the therapeutic efficacy of thymidylate synthase inhibitors. *Cancer Res* 2001; 61(9): 3675-81.
4. Bailey LB, and Caudill, M. A. Folate. Erdman JWJ, MacDonald, I. A., Zeisel, S. H., editors. In: *Present Knowledge in Nutrition*, 10th Edition. Wiley-Blackwell; 2012, p. 321-342.
5. Herbert V. Making sense of laboratory tests of folate status: folate requirements to sustain normality. *Am J Hematol* 1987; 26(2): 199-207.
6. Selhub J, Jacques PF, Dallal G, Choumenkovitch S, Rogers G. The use of blood concentrations of vitamins and their respective functional indicators to define folate and vitamin B12 status. *Food Nutr Bull* 2008; 29(2 Suppl): S67-73.
7. de Benoist B. Conclusions of a WHO Technical Consultation on folate and vitamin B12 deficiencies. *Food Nutr Bull* 2008; 29(2 Suppl): S238-44.
8. Crider KS, Devine O, Hao L, Dowling NF, Li S, Molloy AM, Li Z, Zhu J, Berry RJ. Population red blood cell folate concentrations for prevention of neural tube defects: bayesian model. *BMJ* 2014; 349: g4554.
9. Drogan D, Klipstein-Grobusch K, Wans S, Luley C, Boeing H, Dierkes J. Plasma folate as marker of folate status in epidemiological studies: the European Investigation into Cancer and Nutrition (EPIC)-Potsdam study. *Br J Nutr* 2004; 92(3): 489-96.
10. Yeung L, Yang Q, Berry RJ. Contributions of total daily intake of folic acid to serum folate concentrations. *JAMA* 2008; 300(21): 2486-7.
11. Yang Q, Cogswell ME, Hamner HC, Carriquiry A, Bailey LB, Pfeiffer CM, Berry RJ. Folic acid source, usual intake, and folate and vitamin B-12 status in US adults: National Health and Nutrition Examination Survey (NHANES) 2003-2006. *Am J Clin Nutr* 2010; 91(1): 64-72.
12. Hopkins S.M. MBA, Walton J., Flynn A., Molloy A.M., Scott J.M., McNulty H., Nugent A.P. & Gibney M.J., Impact of voluntary fortification and supplement use on dietary intakes of folate and status in an Irish adult population, 2012, *Proc Nutr Soc*. E38.
13. Tighe P, Ward M, McNulty H, Finnegan O, Dunne A, Strain J, Molloy AM, Duffy M, Pentieva K, Scott JM. A dose-finding trial of the effect of long-term folic acid intervention: implications for food fortification policy. *Am J Clin Nutr* 2011; 93(1): 11-8.
14. Raiten DJ, Fisher KD. Assessment of folate methodology used in the Third National Health and Nutrition Examination Survey (NHANES III, 1988-1994). *J Nutr* 1995; 125(5): 1371S-1398S.
15. Centers for Disease Control and Prevention. Survey Toolkit for Nutritional Assessment. Hosted by the Micronutrient Initiative. Available from: <http://www.micronutrient.org/nutritiontoolkit/>.
16. Institute of Medicine. DRI Reference Intakes for Thiamin, Riboflavin, Niacin, Vitamin B6, Folate, Vitamin B12, Pantothenic Acid, Biotin, and Choline. Washington, D.C.: National Academy Press; 1998.
17. Pfeiffer CM, Johnson CL, Jain RB, Yetley EA, Picciano MF, Rader JI, Fisher KD, Mulinare J, Osterloh JD. Trends in blood folate and vitamin B-12 concentrations in the United States, 1988-2004. *Am J Clin Nutr* 2007; 86(3): 718-27.

## Online Supporting Material

18. West AA, Yan J, Perry CA, Jiang X, Malysheva OV, Caudill MA. Folate-status response to a controlled folate intake in nonpregnant, pregnant, and lactating women. *Am J Clin Nutr* 2012; 96(4): 789-800.
19. Yetley EA, Pfeiffer CM, Phinney KW, Bailey RL, Blackmore S, Bock JL, Brody LC, Carmel R, Curtin LR, Durazo-Arvizu RA, et al. Biomarkers of vitamin B-12 status in NHANES: a roundtable summary. *Am J Clin Nutr* 2011; 94(1): 313S-321S.
20. Pfeiffer CM, Fazili Z, McCoy L, Zhang M, Gunter EW. Determination of folate vitamers in human serum by stable-isotope-dilution tandem mass spectrometry and comparison with radioassay and microbiologic assay. *Clin Chem* 2004; 50(2): 423-32.
21. Hannisdal R, Ueland PM, Svoldal A. Liquid chromatography-tandem mass spectrometry analysis of folate and folate catabolites in human serum. *Clin Chem* 2009; 55(6): 1147-54.
22. Kalmbach RD, Choumenkovitch SF, Troen AM, D'Agostino R, Jacques PF, Selhub J. Circulating folic acid in plasma: relation to folic acid fortification. *Am J Clin Nutr* 2008; 88(3): 763-8.
23. Bailey RL, Mills JL, Yetley EA, Gahche JJ, Pfeiffer CM, Dwyer JT, Dodd KW, Sempos CT, Betz JM, Picciano MF. Unmetabolized serum folic acid and its relation to folic acid intake from diet and supplements in a nationally representative sample of adults aged > or =60 y in the United States. *Am J Clin Nutr* 2010; 92(2): 383-9.
24. Kalmbach RD, Choumenkovitch SF, Troen AP, Jacques PF, D'Agostino R, Selhub J. A 19-base pair deletion polymorphism in dihydrofolate reductase is associated with increased unmetabolized folic acid in plasma and decreased red blood cell folate. *J Nutr* 2008; 138(12): 2323-7.
25. Bailey SW, Ayling JE. The extremely slow and variable activity of dihydrofolate reductase in human liver and its implications for high folic acid intake. *Proc Natl Acad Sci U S A* 2009; 106(36): 15424-9.
26. Centers for Disease Control and Prevention. Second National Report on Biochemical Indicators of Diet and Nutrition in the U.S. Population. 2012,
27. Ganji V, Kafai MR. Trends in serum folate, RBC folate, and circulating total homocysteine concentrations in the United States: analysis of data from National Health and Nutrition Examination Surveys, 1988-1994, 1999-2000, and 2001-2002. *J Nutr* 2006; 136(1): 153-8.
28. Perry CA, Renna SA, Khitun E, Ortiz M, Moriarty DJ, Caudill MA. Ethnicity and race influence the folate status response to controlled folate intakes in young women. *J Nutr* 2004; 134(7): 1786-92.
29. Pfeiffer CM, Sternberg MR, Schleicher RL, Rybak ME. Dietary supplement use and smoking are important correlates of biomarkers of water-soluble vitamin status after adjusting for sociodemographic and lifestyle variables in a representative sample of U.S. Adults. *J Nutr* 2013; 143(6): 957S-65S.
30. Monsen AL, Refsum H, Markestad T, Ueland PM. Cobalamin status and its biochemical markers methylmalonic acid and homocysteine in different age groups from 4 days to 19 years. *Clin Chem* 2003; 49(12): 2067-75.
31. Delvin EE, Rozen R, Merouani A, Genest J, Jr., Lambert M. Influence of methylenetetrahydrofolate reductase genotype, age, vitamin B-12, and folate status on plasma homocysteine in children. *Am J Clin Nutr* 2000; 72(6): 1469-73.
32. Kerr MA, Livingstone B, Bates CJ, Bradbury I, Scott JM, Ward M, Pentieva K, Mansoor MA, McNulty H. Folate, related B vitamins, and homocysteine in childhood and adolescence: potential implications for disease risk in later life. *Pediatrics* 2009; 123(2): 627-35.

## Online Supporting Material

33. Gonzalez-Gross M, Benser J, Breidenassel C, Albers U, Huybrechts I, Valtuena J, Spinneker A, Segoviano M, Widhalm K, Molnar D, et al. Gender and age influence blood folate, vitamin B12, vitamin B6, and homocysteine levels in European adolescents: the Helena Study. *Nutr Res* 2012; 32(11): 817-26.
34. Bjorke-Monsen AL, Torsvik I, Saetran H, Markestad T, Ueland PM. Common metabolic profile in infants indicating impaired cobalamin status responds to cobalamin supplementation. *Pediatrics* 2008; 122(1): 83-91.
35. Milman N, Byg KE, Hvas AM, Bergholt T, Eriksen L. Erythrocyte folate, plasma folate and plasma homocysteine during normal pregnancy and postpartum: a longitudinal study comprising 404 Danish women. *Eur J Haematol* 2006; 76(3): 200-5.
36. Tamura T, Picciano MF. Folate and human reproduction. *Am J Clin Nutr* 2006; 83(5): 993-1016.
37. Ek J, Magnus EM. Plasma and red blood cell folate during normal pregnancies. *Acta Obstet Gynecol Scand* 1981; 60(3): 247-51.
38. Cikot RJ, Steegers-Theunissen RP, Thomas CM, de Boo TM, Merkus HM, Steegers EA. Longitudinal vitamin and homocysteine levels in normal pregnancy. *Br J Nutr* 2001; 85(1): 49-58.
39. Velzing-Aarts FV, Holm PI, Fokkema MR, van der Dijs FP, Ueland PM, Muskiet FA. Plasma choline and betaine and their relation to plasma homocysteine in normal pregnancy. *Am J Clin Nutr* 2005; 81(6): 1383-9.
40. Kim KN, Kim YJ, Chang N. Effects of the interaction between the C677T 5,10-methylenetetrahydrofolate reductase polymorphism and serum B vitamins on homocysteine levels in pregnant women. *Eur J Clin Nutr* 2004; 58(1): 10-6.
41. Ubeda N, Reyes L, Gonzalez-Medina A, Alonso-Apperte E, Varela-Moreiras G. Physiologic changes in homocysteine metabolism in pregnancy: a longitudinal study in Spain. *Nutrition* 2011; 27(9): 925-30.
42. Hure AJ, Collins CE, Smith R. A longitudinal study of maternal folate and vitamin B12 status in pregnancy and postpartum, with the same infant markers at 6 months of age. *Matern Child Health J* 2012; 16(4): 792-801.
43. Glorimar R, Pereira SE, Trugo NM. Longitudinal change in plasma total homocysteine during pregnancy and postpartum in Brazilian women and its relation with folate status and other factors. *Int J Vitam Nutr Res* 2004; 74(2): 95-101.
44. Haynes BM, Pfeiffer CM, Sternberg MR, Schleicher RL. Selected physiologic variables are weakly to moderately associated with 29 biomarkers of diet and nutrition, NHANES 2003-2006. *J Nutr* 2013.
45. Suh JR, Herbig AK, Stover PJ. New perspectives on folate catabolism. *Annu Rev Nutr* 2001; 21: 255-82.
46. Wilson SMC, Bivins BN, Russell KA, Bailey LB. Oral contraceptive use: impact on folate, vitamin B-6, and vitamin B-12 status. *Nutr Rev* 2011; 69(10): 572-583.
47. Rovinett.C, Tolomell.B, Bovina C, Marchett.M. Effects of Testosterone on Metabolism of Folate Coenzymes in Rat. *Biochemical Journal* 1972; 126(2): 291-&.
48. Stanislawski-Sachadyn A, Mitchell LE, Woodside JV, Buckley PT, Kealey C, Young IS, Scott JM, Murray L, Boreham CA, McNulty H, et al. The reduced folate carrier (SLC19A1) c.80G>A polymorphism is associated with red cell folate concentrations among women. *Ann Hum Genet* 2009; 73(Pt 5): 484-91.
49. Fredriksen A, Meyer K, Ueland PM, Vollset SE, Grotmol T, Schneede J. Large-scale population-based metabolic phenotyping of thirteen genetic polymorphisms related to one-carbon metabolism. *Human Mutation* 2007; 28(9): 856-865.

## Online Supporting Material

50. Ueland PM, Hustad S, Schneede J, Refsum H, Vollset SE. Biological and clinical implications of the MTHFR C677T polymorphism. *Trends Pharmacol Sci* 2001; 22(4): 195-201.
51. Bagley PJ, Selhub J. A common mutation in the methylenetetrahydrofolate reductase gene is associated with an accumulation of formylated tetrahydrofolates in red blood cells. *Proc Natl Acad Sci U S A* 1998; 95(22): 13217-20.
52. Smulders YM, Smith DE, Kok RM, Teerlink T, Gellekink H, Vaes WH, Stehouwer CD, Jakobs C. Red blood cell folate vitamers distribution in healthy subjects is determined by the methylenetetrahydrofolate reductase C677T polymorphism and by the total folate status. *J Nutr Biochem* 2007; 18(10): 693-9.
53. Stamm RA, Harper MJ, Houghton LA. Quantitation of whole-blood total folate within defined MTHFR C677T genotype groups by isotope dilution-liquid chromatography-tandem mass spectrometry differs from microbiologic assay. *J Nutr* 2012; 142(12): 2154-60.
54. Clarke R, Bennett DA, Parish S, Verhoef P, Dotsch-Klerk M, Lathrop M, Xu P, Nordestgaard BG, Holm H, Hopewell JC, et al. Homocysteine and coronary heart disease: meta-analysis of MTHFR case-control studies, avoiding publication bias. *PLoS Med* 2012; 9(2): e1001177.
55. Yang QH, Botto LD, Gallagher M, Friedman JM, Sanders CL, Koontz D, Nikolova S, Erickson JD, Steinberg K. Prevalence and effects of gene-gene and gene-nutrient interactions on serum folate and serum total homocysteine concentrations in the United States: findings from the third National Health and Nutrition Examination Survey DNA Bank. *Amn J Clin Nutr* 2008; 88(1): 232-246.
56. Crider KS, Zhu JH, Hao L, Yang QH, Yang TP, Gindler J, Maneval DR, Quinlivan EP, Li Z, Bailey LB, et al. MTHFR 677C->T genotype is associated with folate and homocysteine concentrations in a large, population-based, double-blind trial of folic acid supplementation. *Am J Clin Nutr* 2011; 93(6): 1365-72.
57. Kant AK. Interaction of body mass index and attempt to lose weight in a national sample of US adults: association with reported food and nutrient intake, and biomarkers. *Eur J Clin Nutr* 2003; 57(2): 249-59.
58. Kimmons JE, Blanck HM, Tohill BC, Zhang J, Khan LK. Associations between body mass index and the prevalence of low micronutrient levels among US adults. *MedGenMed* 2006; 8(4): 59.
59. Huemer M, Vonblon K, Fodinger M, Krumpholz R, Hubmann M, Ulmer H, Simma B. Total homocysteine, folate, and cobalamin, and their relation to genetic polymorphisms, lifestyle and body mass index in healthy children and adolescents. *Pediatr Res* 2006; 60(6): 764-9.
60. Mahabir S, Ettinger S, Johnson L, Baer DJ, Clevidence BA, Hartman TJ, Taylor PR. Measures of adiposity and body fat distribution in relation to serum folate levels in postmenopausal women in a feeding study. *Eur J Clin Nutr* 2008; 62(5): 644-50.
61. Ortega RM, Lopez-Sobaler AM, Andres P, Rodriguez-Rodriguez E, Aparicio A, Perea JM. Folate status in young overweight and obese women: changes associated with weight reduction and increased folate intake. *J Nutr Sci Vitaminol (Tokyo)* 2009; 55(2): 149-55.
62. Nakazato M, Maeda T, Takamura N, Wada M, Yamasaki H, Johnston KE, Tamura T. Relation of body mass index to blood folate and total homocysteine concentrations in Japanese adults. *Eur J Nutr* 2011; 50(7): 581-5.
63. Tinker SC, Hamner HC, Berry RJ, Bailey LB, Pfeiffer CM. Does obesity modify the association of supplemental folic acid with folate status among nonpregnant women of childbearing age in the United States? *Birth Defects Res A Clin Mol Teratol* 2012.
64. Mojtabai R. Body mass index and serum folate in childbearing age women. *Eur J Epidemiol* 2004; 19(11): 1029-36.
65. da Silva VR, Hausman DB, Kauwell GP, Sokolow A, Tackett RL, Rathbun SL, Bailey LB. Obesity affects short-term folate pharmacokinetics in women of childbearing age. *Int J Obes (Lond)* 2013; 37(12):1608-10.

## Online Supporting Material

66. Metz J. Folic acid metabolism and malaria. *Food Nutr Bull* 2007; 28(4 Suppl): S540-9.
67. Oppenheimer SJ, Cashin P. Serum and red cell folate levels associated with malarial parasitaemia. *Trans R Soc Trop Med Hyg* 1986; 80(1): 169-71.
68. Chango A, Abdennebi-Najar L. Folate metabolism pathway and Plasmodium falciparum malaria infection in pregnancy. *Nutr Rev* 2011; 69(1): 34-40.
69. Forrester JE, Sztam KA. Micronutrients in HIV/AIDS: is there evidence to change the WHO 2003 recommendations? *Am J Clin Nutr* 2011; 94(6): 1683S-1689S.
70. Remacha AF, Cadafalch J, Sarda P, Barcelo M, Fuster M. Vitamin B-12 metabolism in HIV-infected patients in the age of highly active antiretroviral therapy: role of homocysteine in assessing vitamin B-12 status. *Am J Clin Nutr* 2003; 77(2): 420-4.
71. Friis H, Gomo E, Koestel P, Ndhlovu P, Nyazema N, Krarup H, Michaelsen KF. HIV and other predictors of serum folate, serum ferritin, and hemoglobin in pregnancy: a cross-sectional study in Zimbabwe. *Am J Clin Nutr* 2001; 73(6): 1066-73.
72. Ndeez G, Tumwine JK, Ndugwa CM, Bolann BJ, Tylleskar T. Multiple micronutrient supplementation improves vitamin B(1)(2) and folate concentrations of HIV infected children in Uganda: a randomized controlled trial. *Nutr J* 2011; 10: 56.
73. Alani A, Vincent O, Adewumi A, Titilope A, Onogu E, Ralph A, Hab C. Plasma folate studies in HIV-positive patients at the Lagos university teaching hospital, Nigeria. *Indian J Sex Transm Dis* 2010; 31(2): 99-103.
74. Malik ZA, Abadi J, Sansary J, Rosenberg M. Elevated levels of vitamin B12 and folate in vertically infected children with HIV-1. *AIDS* 2009; 23(3): 403-7.
75. Tomkins A. Assessing micronutrient status in the presence of inflammation. *J Nutr* 2003; 133(5 Suppl 2): 1649S-1655S.
76. Folsom AR, Desvarieux M, Nieto FJ, Boland LL, Ballantyne CM, Chambless LE. B vitamin status and inflammatory markers. *Atherosclerosis* 2003; 169(1): 169-74.
77. Friso S, Jacques PF, Wilson PW, Rosenberg IH, Selhub J. Low circulating vitamin B(6) is associated with elevation of the inflammation marker C-reactive protein independently of plasma homocysteine levels. *Circulation* 2001; 103(23): 2788-91.
78. Durga J, van Tits LJ, Schouten EG, Kok FJ, Verhoef P. Effect of lowering of homocysteine levels on inflammatory markers: a randomized controlled trial. *Arch Intern Med* 2005; 165(12): 1388-94.
79. Bleie O, Semb AG, Grundt H, Nordrehaug JE, Vollset SE, Ueland PM, Nilsen DW, Bakken AM, Refsum H, Nygard OK. Homocysteine-lowering therapy does not affect inflammatory markers of atherosclerosis in patients with stable coronary artery disease. *J Intern Med* 2007; 262(2): 244-53.
80. Solini A, Santini E, Ferrannini E. Effect of short-term folic acid supplementation on insulin sensitivity and inflammatory markers in overweight subjects. *Int J Obes (Lond)* 2006; 30(8): 1197-202.
81. Duthie SJ, Horgan G, de Roos B, Rucklidge G, Reid M, Duncan G, Pirie L, Basten GP, Powers HJ. Blood folate status and expression of proteins involved in immune function, inflammation, and coagulation: biochemical and proteomic changes in the plasma of humans in response to long-term synthetic folic acid supplementation. *J Proteome Res* 2010; 9(4): 1941-50.
82. Refsum H, Wesenberg F, Ueland PM. Plasma homocysteine in children with acute lymphoblastic leukemia: changes during a chemotherapeutic regimen including methotrexate. *Cancer Res* 1991; 51(3): 828-35.

## Online Supporting Material

83. Wani NA, Hamid A, Kaur J. Folate status in various pathophysiological conditions. *IUBMB Life* 2008; 60(12): 834-42.
84. Bystrom P, Bjorkegren K, Larsson A, Johansson L, Berglund A. Serum vitamin B12 and folate status among patients with chemotherapy treatment for advanced colorectal cancer. *Ups J Med Sci* 2009; 114(3): 160-4.
85. McDonald I, Connolly M, Tobin AM. A review of psoriasis, a known risk factor for cardiovascular disease and its impact on folate and homocysteine metabolism. *J Nutr Metab* 2012; 2012: 965385.
86. Malerba M, Gisondi P, Radaeli A, Sala R, Calzavara Pinton PG, Girolomoni G. Plasma homocysteine and folate levels in patients with chronic plaque psoriasis. *Br J Dermatol* 2006; 155(6): 1165-9.
87. Refsum H, Helland S, Ueland PM. Fasting plasma homocysteine as a sensitive parameter of antifolate effect: a study of psoriasis patients receiving low-dose methotrexate treatment. *Clin Pharmacol Ther* 1989; 46(5): 510-20.
88. Hwang C, Ross V, Mahadevan U. Micronutrient deficiencies in inflammatory bowel disease: from A to zinc. *Inflamm Bowel Dis* 2012; 18(10): 1961-81.
89. Liu YK. Folate deficiency in children with sickle cell anemia. *Am J Dis Child* 1974; 127(3): 389-93.
90. Kennedy TS, Fung EB, Kawchak DA, Zemel BS, Ohene-Frempong K, Stallings VA. Red blood cell folate and serum vitamin B12 status in children with sickle cell disease. *J Pediatr Hematol Oncol* 2001; 23(3): 165-9.
91. van der Dijs FP, Schnog JJ, Brouwer DA, Velvis HJ, van den Berg GA, Bakker AJ, Duits AJ, Muskiet FD, Muskiet FA. Elevated homocysteine levels indicate suboptimal folate status in pediatric sickle cell patients. *Am J Hematol* 1998; 59(3): 192-8.
92. Rodriguez-Cortes HM, Griener JC, Hyland K, Bottiglieri T, Bennett MJ, Kamen BA, Buchanan GR. Plasma homocysteine levels and folate status in children with sickle cell anemia. *J Pediatr Hematol Oncol* 1999; 21(3): 219-23.
93. Dhar M, Bellevue R, Brar S, Carmel R. Mild hyperhomocysteinemia in adult patients with sickle cell disease: a common finding unrelated to folate and cobalamin status. *Am J Hematol* 2004; 76(2): 114-20.
94. Muskiet FA, van der Dijs FP, Fokkema MR, Muskiet FD. Erythrocyte folate does not accurately reflect folate status in sickle cell disease. *Clin Chem* 2000; 46(12): 2015-6.
95. Ford HC, Carter JM, Rendle MA. Serum and red cell folate and serum vitamin B12 levels in hyperthyroidism. *Am J Hematol* 1989; 31(4): 233-6.
96. Nedrebo BG, Ericsson UB, Nygard O, Refsum H, Ueland PM, Aakvaag A, Aanderud S, Lien EA. Plasma total homocysteine levels in hyperthyroid and hypothyroid patients. *Metabolism* 1998; 47(1): 89-93.
97. Morris MS, Bostom AG, Jacques PF, Selhub J, Rosenberg IH. Hyperhomocysteinemia and hypercholesterolemia associated with hypothyroidism in the third US National Health and Nutrition Examination Survey. *Atherosclerosis* 2001; 155(1): 195-200.
98. Nedrebo BG, Nygard O, Ueland PM, Lien EA. Plasma total homocysteine in hyper- and hypothyroid patients before and during 12 months of treatment. *Clin Chem* 2001; 47(9): 1738-41.
99. Diekman MJ, van der Put NM, Blom HJ, Tijssen JG, Wiersinga WM. Determinants of changes in plasma homocysteine in hyperthyroidism and hypothyroidism. *Clin Endocrinol (Oxf)* 2001; 54(2): 197-204.
100. Nedrebo BG, Hustad S, Schneede J, Ueland PM, Vollset SE, Holm PI, Aanderud S, Lien EA. Homocysteine and its relation to B-vitamins in Graves' disease before and after treatment: effect modification by smoking. *J Intern Med* 2003; 254(5): 504-12.



## Online Supporting Material

101. Christ-Crain M, Meier C, Guglielmetti M, Huber PR, Riesen W, Staub JJ, Muller B. Elevated C-reactive protein and homocysteine values: cardiovascular risk factors in hypothyroidism? A cross-sectional and a double-blind, placebo-controlled trial. *Atherosclerosis* 2003; 166(2): 379-86.
102. Hustad S, Nedrebo BG, Ueland PM, Schneede J, Vollset SE, Ulvik A, Lien EA. Phenotypic expression of the methylenetetrahydrofolate reductase 677C-->T polymorphism and flavin cofactor availability in thyroid dysfunction. *Am J Clin Nutr* 2004; 80(4): 1050-7.
103. Cronin CC, McPartlin JM, Barry DG, Ferriss JB, Scott JM, Weir DG. Plasma homocysteine concentrations in patients with type 1 diabetes. *Diabetes Care* 1998; 21(11): 1843-7.
104. Salardi S, Cacciari E, Sassi S, Grossi G, Mainetti B, Dalla Casa C, Pirazzoli P, Cicognani A, Gualandi S. Homocysteinemia, serum folate and vitamin B12 in very young patients with diabetes mellitus type 1. *J Pediatr Endocrinol Metab* 2000; 13(9): 1621-7.
105. Sakuta H, Suzuki T, Yasuda H, Ito T. Plasma folate levels in men with type 2 diabetes. *Int J Vitam Nutr Res* 2005; 75(5): 307-11.
106. Kaye JM, Stanton KG, McCann VJ, Vasikaran SD, Burke V, Taylor RR, van Bockxmeer FM. Homocysteine, folate, methylene tetrahydrofolate reductase genotype and vascular morbidity in diabetic subjects. *Clin Sci (Lond)* 2002; 102(6): 631-7.
107. Wulfele MG, Kooy A, Lehert P, Bets D, Ogterop JC, Borger van der Burg B, Donker AJ, Stehouwer CD. Effects of short-term treatment with metformin on serum concentrations of homocysteine, folate and vitamin B12 in type 2 diabetes mellitus: a randomized, placebo-controlled trial. *J Intern Med* 2003; 254(5): 455-63.
108. Al-Maskari MY, Waly MI, Ali A, Al-Shuaibi YS, Ouhtit A. Folate and vitamin B12 deficiency and hyperhomocysteinemia promote oxidative stress in adult type 2 diabetes. *Nutrition* 2012; 28(7-8): e23-6.
109. Makoff R. Vitamin replacement therapy in renal failure patients. *Miner Electrolyte Metab* 1999; 25(4-6): 349-51.
110. Descombes E, Hanck AB, Fellay G. Water soluble vitamins in chronic hemodialysis patients and need for supplementation. *Kidney Int* 1993; 43(6): 1319-28.
111. De Vecchi AF, Bamonti-Catena F, Finazzi S, Campolo J, Taioli E, Novembrino C, Colucci P, Accinni R, De Franceschi M, Fasano MA, et al. Homocysteine, vitamin B12, and serum and erythrocyte folate in peritoneal dialysis and hemodialysis patients. *Perit Dial Int* 2000; 20(2): 169-73.
112. De Vecchi AF, Patrosso C, Novembrino C, Finazzi S, Colucci P, De Franceschi M, Fasano MA, Bamonti-Catena F. Folate supplementation in peritoneal dialysis patients with normal erythrocyte folate: effect on plasma homocysteine. *Nephron* 2001; 89(3): 297-302.
113. Fazili Z, Whitehead RD, Jr., Paladugula N, Pfeiffer CM. A high-throughput LC-MS/MS method suitable for population biomonitoring measures five serum folate vitamers and one oxidation product. *Anal Bioanal Chem* 2013; 405(13): 4549-60.
114. Fazili Z, Pfeiffer CM. Measurement of folates in serum and conventionally prepared whole blood lysates: application of an automated 96-well plate isotope-dilution tandem mass spectrometry method. *Clin Chem* 2004; 50(12): 2378-81.
115. O'Broin JD, Temperley IJ, Scott JM. Erythrocyte, plasma, and serum folate: specimen stability before microbiological assay. *Clin Chem* 1980; 26(3): 522-4.
116. Hannisdal R, Ueland PM, Eussen SJ, Svoldal A, Hustad S. Analytical recovery of folate degradation products formed in human serum and plasma at room temperature. *J Nutr* 2009; 139(7): 1415-8.

## Online Supporting Material

117. Midttun O, Townsend MK, Nygard O, Tworoger SS, Brennan P, Johansson M, Ueland PM. Most blood biomarkers related to vitamin status, one-carbon metabolism, and the kynurenine pathway show adequate preanalytical stability and within-person reproducibility to allow assessment of exposure or nutritional status in healthy women and cardiovascular patients. *J Nutr* 2014; 144(5): 784-90.
118. Priest DG, Bunni MA. Folate and folate antagonists in cancer chemotherapy. Bailey LB, editors. In: *Folate in health and disease*. New York: Marcel Decker; 1995, p. 379-404.
119. Morgan SL, Baggott JE, Refsum H, Ueland PM. Homocysteine levels in patients with rheumatoid arthritis treated with low-dose methotrexate. *Clin Pharmacol Ther* 1991; 50(5 Pt 1): 547-56.
120. van Ede AE, Laan RF, Blom HJ, Boers GH, Haagsma CJ, Thomas CM, De Boo TM, van de Putte LB. Homocysteine and folate status in methotrexate-treated patients with rheumatoid arthritis. *Rheumatology (Oxford)* 2002; 41(6): 658-65.
121. Smulders YM, de Man AM, Stehouwer CD, Slaats EH. Trimethoprim and fasting plasma homocysteine. *Lancet* 1998; 352(9143): 1827-8.
122. Linnebank M, Moskau S, Semmler A, Widman G, Stoffel-Wagner B, Weller M, Elger CE. Antiepileptic drugs interact with folate and vitamin B12 serum levels. *Ann Neurol* 2011; 69(2): 352-9.
123. Belcastro V, Striano P. Antiepileptic drugs, hyperhomocysteinemia and B-vitamins supplementation in patients with epilepsy. *Epilepsy Res* 2012; 102(1-2): 1-7.
124. Dierkes J, Luley C, Westphal S. Effect of lipid-lowering and anti-hypertensive drugs on plasma homocysteine levels. *Vasc Health Risk Manag* 2007; 3(1): 99-108.
125. Sobczynska-Malefora A, Harrington DJ, Lomer MC, Pettitt C, Hamilton S, Rangarajan S, Shearer MJ. Erythrocyte folate and 5-methyltetrahydrofolate levels decline during 6 months of oral anticoagulation with warfarin. *Blood Coagul Fibrinolysis* 2009; 20(4): 297-302.
126. Hatzis CM, Bertias GK, Linardakis M, Scott JM, Kafatos AG. Dietary and other lifestyle correlates of serum folate concentrations in a healthy adult population in Crete, Greece: a cross-sectional study. *Nutr J* 2006; 5: 5.
127. Ulvik A, Vollset SE, Hoff G, Ueland PM. Coffee consumption and circulating B-vitamins in healthy middle-aged men and women. *Clin Chem* 2008; 54(9): 1489-96.
128. Thuesen BH, Husemoen LL, Ovesen L, Jorgensen T, Fenger M, Linneberg A. Lifestyle and genetic determinants of folate and vitamin B12 levels in a general adult population. *Br J Nutr* 2010; 103(8): 1195-204.
129. Nygard O, Refsum H, Ueland PM, Stensvold I, Nordrehaug JE, Kvale G, Vollset SE. Coffee consumption and plasma total homocysteine: The Hordaland Homocysteine Study. *Am J Clin Nutr* 1997; 65(1): 136-43.
130. Nygard O, Refsum H, Ueland PM, Vollset SE. Major lifestyle determinants of plasma total homocysteine distribution: the Hordaland Homocysteine Study. *Am J Clin Nutr* 1998; 67(2): 263-70.
131. Okumura K, Tsukamoto H. Folate in smokers. *Clin Chim Acta* 2011; 412(7-8): 521-6.
132. Ulvik A, Ebbing M, Hustad S, Midttun O, Nygard O, Vollset SE, Bonna KH, Nordrehaug JE, Nilsen DW, Schirmer H, et al. Long- and short-term effects of tobacco smoking on circulating concentrations of B vitamins. *Clin Chem* 2010; 56(5): 755-63.

## Online Supporting Material

133. Gibson A, Woodside JV, Young IS, Sharpe PC, Mercer C, Patterson CC, McKinley MC, Kluijtmans LA, Whitehead AS, Evans A. Alcohol increases homocysteine and reduces B vitamin concentration in healthy male volunteers--a randomized, crossover intervention study. *QJM* 2008; 101(11): 881-7.
134. Alonso-Aperte E, Varela-Moreiras G. Drugs-nutrient interactions: a potential problem during adolescence. *Eur J Clin Nutr* 2000; 54: S69-S74.
135. Lutz UC. Alterations in homocysteine metabolism among alcohol dependent patients--clinical, pathobiochemical and genetic aspects. *Curr Drug Abuse Rev* 2008; 1(1): 47-55.
136. Woolf K, Manore MM. B-vitamins and exercise: does exercise alter requirements? *Int J Sport Nutr Exerc Metab* 2006; 16(5): 453-84.
137. Konig D, Bisse E, Deibert P, Muller HM, Wieland H, Berg A. Influence of training volume and acute physical exercise on the homocysteine levels in endurance-trained men: interactions with plasma folate and vitamin B12. *Ann Nutr Metab* 2003; 47(3-4): 114-8.
138. Herrmann M, Schorr H, Obeid R, Scharhag J, Urhausen A, Kindermann W, Herrmann W. Homocysteine increases during endurance exercise. *Clin Chem Lab Med* 2003; 41(11): 1518-24.
139. Wickham C, O'Broin S, Kevany J. Seasonal variation in folate nutritional status. *Ir J Med Sci* 1983; 152(8): 295-9.
140. McKinley MC, Strain JJ, McPartlin J, Scott JM, McNulty H. Plasma homocysteine is not subject to seasonal variation. *Clin Chem* 2001; 47(8): 1430-6.
141. Hao L, Ma J, Stampfer MJ, Ren A, Tian Y, Tang Y, Willett WC, Li Z. Geographical, seasonal and gender differences in folate status among Chinese adults. *J Nutr* 2003; 133(11): 3630-5.
142. Hao L, Ma J, Zhu J, Stampfer MJ, Tian Y, Willett WC, Li Z. High prevalence of hyperhomocysteinemia in Chinese adults is associated with low folate, vitamin B-12, and vitamin B-6 status. *J Nutr* 2007; 137(2): 407-13.
143. Shane B. Folate status assessment history: implications for measurement of biomarkers in NHANES. *Am J Clin Nutr* 2011; 94(1): 337S-342S.
144. Gibson RS. *Principles of nutritional assessment* (2nd edn.). New York: Oxford Press; 2005.
145. Wu A, Chanarin I, Slavin G, Levi AJ. Folate deficiency in the alcoholic--its relationship to clinical and haematological abnormalities, liver disease and folate stores. *Br J Haematol* 1975; 29(3): 469-78.
146. Mason JB. Biomarkers of nutrient exposure and status in one-carbon (methyl) metabolism. *J Nutr* 2003; 133 Suppl 3: 941S-947S.
147. Clifford AJ, Noceti EM, Block-Joy A, Block T, Block G. Erythrocyte folate and its response to folic acid supplementation is assay dependent in women. *J Nutr* 2005; 135(1): 137-43.
148. O'Broin SD, Kelleher BP, Davoren A, Gunter EW. Field-study screening of blood folate concentrations: specimen stability and finger-stick sampling. *Am J Clin Nutr* 1997; 66(6): 1398-1405.
149. O'Broin SD, Gunter EW. Screening of folate status with use of dried blood spots on filter paper. *Am J Clin Nutr* 1999; 70(3): 359-367.
150. Rabinowitz DJ, Zhang M, Paladugula N, LaVoie DJ, Pfeiffer CM. A Fresh Look at the Folate Microbiological Assay, Including Dried Blood Spots and Preanalytical Conditions for Whole Blood Samples. *Clin Chem* 2009; 55(6): A227-A228.
151. Daly LE, Kirke PN, Molloy A, Weir DG, Scott JM. Folate levels and neural tube defects. Implications for prevention. *JAMA* 1995; 274(21): 1698-702.

## Online Supporting Material

152. World Health Organization. Guidelines for optimal serum and red blood cell folate concentrations in women of reproductive age for prevention of neural tube defects. Geneva(Switzerland): World Health Organization; 2015.
153. Davis SR, Quinlivan EP, Shelnutt KP, Maneval DR, Ghandour H, Capdevila A, Coats BS, Wagner C, Selhub J, Bailey LB, et al. The methylenetetrahydrofolate reductase 677C->T polymorphism and dietary folate restriction affect plasma one-carbon metabolites and red blood cell folate concentrations and distribution in women. *J Nutr* 2005; 135(5): 1040-4.
154. Refsum H, Smith AD, Ueland PM, Nexø E, Clarke R, McPartlin J, Johnston C, Engbaek F, Schneede J, McPartlin C, et al. Facts and recommendations about total homocysteine determinations: an expert opinion. *Clin Chem* 2004; 50(1): 3-32.
155. Ernest S, Hosack A, O'Brien WE, Rosenblatt DS, Nadeau JH. Homocysteine levels in A/J and C57BL/6J mice: genetic, diet, gender, and parental effects. *Physiol Genomics* 2005; 21(3): 404-10.
156. Geisler J, Geisler SB, Lønning PE, Smaaland R, Tveit KM, Refsum H, Ueland PM. Changes in folate status as determined by reduction in total plasma homocysteine levels during leucovorin modulation of 5-fluorouracil therapy in cancer patients. *Clin Cancer Res* 1998; 4(9): 2125-8.
157. Jacob RA, Wu MM, Henning SM, Swendseid ME. Homocysteine increases as folate decreases in plasma of healthy men during short-term dietary folate and methyl group restriction. *J Nutr* 1994; 124(7): 1072-80.
158. Gregory JF, 3rd, Quinlivan EP. In vivo kinetics of folate metabolism. *Annu Rev Nutr* 2002; 22: 199-220.
159. Ueland PM, Refsum H, Stabler SP, Malinow MR, Andersson A, Allen RH. Total homocysteine in plasma or serum: methods and clinical applications. *Clin Chem* 1993; 39(9): 1764-79.
160. Ubbink JB, Becker PJ, Vermaak WJ, Delport R. Results of B-vitamin supplementation study used in a prediction model to define a reference range for plasma homocysteine. *Clin Chem* 1995; 41(7): 1033-7.
161. Rasmussen K, Møller J, Lyngbak M, Pedersen AM, Dybkjaer L. Age- and gender-specific reference intervals for total homocysteine and methylmalonic acid in plasma before and after vitamin supplementation. *Clin Chem* 1996; 42(4): 630-6.
162. den Heijer M, Brouwer IA, Bos GM, Blom HJ, van der Put NM, Spaans AP, Rosendaal FR, Thomas CM, Haak HL, Wijermans PW, et al. Vitamin supplementation reduces blood homocysteine levels: a controlled trial in patients with venous thrombosis and healthy volunteers. *Arterioscler Thromb Vasc Biol* 1998; 18(3): 356-61.
163. Fokkema MR, Weijer JM, Dijck-Brouwer DA, van Doormaal JJ, Muskiet FA. Influence of vitamin-optimized plasma homocysteine cutoff values on the prevalence of hyperhomocysteinemia in healthy adults. *Clin Chem* 2001; 47(6): 1001-7.
164. Members NLC, Myers GL, Christenson RH, Cushman M, Ballantyne CM, Cooper GR, Pfeiffer CM, Grundy SM, Labarthe DR, Levy D, et al. National Academy of Clinical Biochemistry Laboratory Medicine Practice guidelines: emerging biomarkers for primary prevention of cardiovascular disease. *Clin Chem* 2009; 55(2): 378-84.
165. Pfeiffer CM, Schleicher RL, Johnson CL, Coates PM. Assessing vitamin status in large population surveys by measuring biomarkers and dietary intake - two case studies: folate and vitamin D. *Food Nutr Res* 2012; 56.
166. Hustad S, Midttun O, Schneede J, Vollset SE, Grotmol T, Ueland PM. The methylenetetrahydrofolate reductase 677C->T polymorphism as a modulator of a B vitamin network with major effects on homocysteine metabolism. *Am J Hum Genet* 2007; 80(5): 846-55.

## Online Supporting Material

167. Holm PI, Hustad S, Ueland PM, Vollset SE, Grotmol T, Schneede J. Modulation of the homocysteine-betaine relationship by methylenetetrahydrofolate reductase 677 C->t genotypes and B-vitamin status in a large-scale epidemiological study. *J Clin Endocrinol Metab* 2007; 92(4): 1535-41.
168. Clarke R, Frost C, Sherliker P, Lewington S, Collins R, Brattstrom L, Brouwer I, van Dusseldorp M, Steegers-Theunissen RPM, Cuskelly G, et al. Dose-dependent effects of folic acid on blood concentrations of homocysteine: a meta-analysis of the randomized trials. *Am J Clin Nutr* 2005; 82(4): 806-812.
169. Jacques PF, Selhub J, Bostom AG, Wilson PW, Rosenberg IH. The effect of folic acid fortification on plasma folate and total homocysteine concentrations. *N Engl J Med* 1999; 340(19): 1449-54.
170. Pfeiffer CM, Osterloh JD, Kennedy-Stephenson J, Picciano MF, Yetley EA, Rader JI, Johnson CL. Trends in circulating concentrations of total homocysteine among US adolescents and adults: findings from the 1991-1994 and 1999-2004 National Health and Nutrition Examination Surveys. *Clin Chem* 2008; 54(5): 801-13.
171. Toole JF, Malinow MR, Chambless LE, Spence JD, Pettigrew LC, Howard VJ, Sides EG, Wang CH, Stampfer M. Lowering homocysteine in patients with ischemic stroke to prevent recurrent stroke, myocardial infarction, and death: the Vitamin Intervention for Stroke Prevention (VISP) randomized controlled trial. *JAMA* 2004; 291(5): 565-75.
172. Refsum H, Fredriksen A, Meyer K, Ueland PM, Kase BF. Birth prevalence of homocystinuria. *J Pediatr* 2004; 144(6): 830-2.
173. Yap S, Naughten ER, Wilcken B, Wilcken DE, Boers GH. Vascular complications of severe hyperhomocysteinemia in patients with homocystinuria due to cystathionine beta-synthase deficiency: effects of homocysteine-lowering therapy. *Semin Thromb Hemost* 2000; 26(3): 335-40.
174. Ueland PM, Schneede J. [Measurement of methylmalonic acid, homocysteine and methionine in cobalamin and folate deficiencies and homocystinuria]. *Tidsskr Nor Laegeforen* 2008; 128(6): 690-3.
175. Ueland PM, Monsen AL. Hyperhomocysteinemia and B-vitamin deficiencies in infants and children. *Clin Chem Lab Med* 2003; 41(11): 1418-26.
176. Green R. Indicators for assessing folate and vitamin B12 status and for monitoring the efficacy of intervention strategies. *Food Nutr Bull* 2008; 29(2 Suppl): S52-63; discussion S64-6.
177. Murphy MM, Scott JM, Arijia V, Molloy AM, Fernandez-Ballart JD. Maternal homocysteine before conception and throughout pregnancy predicts fetal homocysteine and birth weight. *Clin Chem* 2004; 50(8): 1406-12.
178. Dimitrova KR, DeGroot K, Myers AK, Kim YD. Estrogen and homocysteine. *Cardiovasc Res* 2002; 53(3): 577-588.
179. Morris MS, Jacques PF, Selhub J, Rosenberg IH. Total homocysteine and estrogen status indicators in the Third National Health and Nutrition Examination Survey. *Am J Epidemiol* 2000; 152(2): 140-148.
180. Pour HRN, Grobbee DE, Muller M, Emmelot-Vonk M, van der Schouw YT. Serum sex hormone and plasma homocysteine levels in middleaged and elderly men. *Eur J Endocrinol* 2006; 155(6): 887-893.
181. Papandreou D, Rousso I, Makedou A, Arvanitidou M, Mavromichalis I. Association of blood pressure, obesity and serum homocysteine levels in healthy children. *Acta Paediatr* 2007; 96(12): 1819-23.

## Online Supporting Material

182. Elshorbagy AK, Nurk E, Gjesdal CG, Tell GS, Ueland PM, Nygard O, Tverdal A, Vollset SE, Refsum H. Homocysteine, cysteine, and body composition in the Hordaland Homocysteine Study: does cysteine link amino acid and lipid metabolism? *Am J Clin Nutr* 2008; 88(3): 738-46.
183. Douamba Z, Bisseye C, Djigma FW, Compaore TR, Bazie VJ, Pietra V, Nikiema JB, Simpore J. Asymptomatic malaria correlates with anaemia in pregnant women at Ouagadougou, Burkina Faso. *J Biomed Biotechnol* 2012; 2012: 198317.
184. Chillemi R, Zappacosta B, Simpore J, Persichilli S, Musumeci M, Musumeci S. Hyperhomocysteinemia in acute *Plasmodium falciparum* malaria: an effect of host-parasite interaction. *Clin Chim Acta* 2004; 348(1-2): 113-20.
185. Muller F, Svoldal AM, Aukrust P, Berge RK, Ueland PM, Froland SS. Elevated plasma concentration of reduced homocysteine in patients with human immunodeficiency virus infection. *Am J Clin Nutr* 1996; 63(2): 242-8.
186. Uccelli MC, Torti C, Lapadula G, Labate L, Cologni G, Tirelli V, Moretti F, Costarelli S, Quiros-Roldan E, Carosi G. Influence of folate serum concentration on plasma homocysteine levels in HIV-positive patients exposed to protease inhibitors undergoing HAART. *Ann Nutr Metab* 2006; 50(3): 247-52.
187. Raiszadeh F, Hoover DR, Lee I, Shi Q, Anastos K, Gao W, Kaplan RC, Glesby MJ. Plasma homocysteine is not associated with HIV serostatus or antiretroviral therapy in women. *J Acquir Immune Defic Syndr* 2009; 51(2): 175-8.
188. Jonasson T, Ohlin AK, Gottsater A, Hultberg B, Ohlin H. Plasma homocysteine and markers for oxidative stress and inflammation in patients with coronary artery disease--a prospective randomized study of vitamin supplementation. *Clin Chem Lab Med* 2005; 43(6): 628-34.
189. Frick B, Schroecksadel K, Neurauter G, Leblhuber F, Fuchs D. Increasing production of homocysteine and neopterin and degradation of tryptophan with older age. *Clin Biochem* 2004; 37(8): 684-7.
190. Schroecksadel K, Frick B, Kaser S, Wirleitner B, Ledochowski M, Mur E, Herold M, Fuchs D. Moderate hyperhomocysteinaemia and immune activation in patients with rheumatoid arthritis. *Clin Chim Acta* 2003; 338(1-2): 157-64.
191. Schroecksadel K, Frick B, Winkler C, Fuchs D. Crucial role of interferon-gamma and stimulated macrophages in cardiovascular disease. *Curr Vasc Pharmacol* 2006; 4(3): 205-13.
192. Schroecksadel K, Frick B, Fiegl M, Winkler C, Denz HA, Fuchs D. Hyperhomocysteinaemia and immune activation in patients with cancer. *Clin Chem Lab Med* 2007; 45(1): 47-53.
193. Oussalah A, Gueant JL, Peyrin-Biroulet L. Meta-analysis: hyperhomocysteinaemia in inflammatory bowel diseases. *Aliment Pharmacol Ther* 2011; 34(10): 1173-84.
194. Lowenthal EA, Mayo MS, Cornwell PE, Thornley-Brown D. Homocysteine elevation in sickle cell disease. *J Am Coll Nutr* 2000; 19(5): 608-12.
195. Balasa VV, Kalinyak KA, Bean JA, Stroop D, Gruppo RA. Hyperhomocysteinemia is associated with low plasma pyridoxine levels in children with sickle cell disease. *J Pediatr Hematol Oncol* 2002; 24(5): 374-9.
196. Demirbas B, Ozkaya M, Cakal E, Culha C, Gulcelik N, Koc G, Serter R, Aral Y. Plasma homocysteine levels in hyperthyroid patients. *Endocr J* 2004; 51(1): 121-5.

## Online Supporting Material

197. Wollesen F, Brattstrom L, Refsum H, Ueland PM, Berglund L, Berne C. Plasma total homocysteine and cysteine in relation to glomerular filtration rate in diabetes mellitus. *Kidney Int* 1999; 55(3): 1028-35.
198. Shargorodsky M, Boaz M, Pasternak S, Hanah R, Matas Z, Fux A, Beigel Y, Mashavi M. Serum homocysteine, folate, vitamin B12 levels and arterial stiffness in diabetic patients: which of them is really important in atherogenesis? *Diabetes Metab Res Rev* 2009; 25(1): 70-5.
199. van Guldener C, Stehouwer CD. Diabetes mellitus and hyperhomocysteinemia. *Semin Vasc Med* 2002; 2(1): 87-95.
200. Wijekoon EP, Brosnan ME, Brosnan JT. Homocysteine metabolism in diabetes. *Biochem Soc Trans* 2007; 35(Pt 5): 1175-9.
201. Asnani S, Chan E, Murthy SN, McNamara DB, Fonseca VA. Effect of pharmacological treatments for diabetes on homocysteine. *Metab Syndr Relat Disord* 2003; 1(2): 149-58.
202. Davies L, Wilmshurst EG, McElduff A, Gunton J, Clifton-Bligh P, Fulcher GR. The relationship among homocysteine, creatinine clearance, and albuminuria in patients with type 2 diabetes. *Diabetes Care* 2001; 24(10): 1805-9.
203. Anwar W, Gueant JL, Abdelmouttaleb I, Adjalla C, Gerard P, Lemoel G, Erraess N, Moutabarrek A, Namour F. Hyperhomocysteinemia is related to residual glomerular filtration and folate, but not to methylenetetrahydrofolate-reductase and methionine synthase polymorphisms, in supplemented end-stage renal disease patients undergoing hemodialysis. *Clin Chem Lab Med* 2001; 39(8): 747-52.
204. Gonin JM. Folic acid supplementation to prevent adverse events in individuals with chronic kidney disease and end stage renal disease. *Curr Opin Nephrol Hypertens* 2005; 14(3): 277-81.
205. Dierkes J, Domrose U, Ambrosch A, Bosselmann HP, Neumann KH, Luley C. Response of hyperhomocysteinemia to folic acid supplementation in patients with end-stage renal disease. *Clin Nephrol* 1999; 51(2): 108-15.
206. Beaulieu AJ, Gohh RY, Han H, Hakas D, Jacques PF, Selhub J, Bostom AG. Enhanced reduction of fasting total homocysteine levels with supraphysiological versus standard multivitamin dose folic acid supplementation in renal transplant recipients. *Arterioscler Thromb Vasc Biol* 1999; 19(12): 2918-21.
207. Tamura T, Johnston KE, Bergman SM. Homocysteine and folate concentrations in blood from patients treated with hemodialysis. *J Am Soc Nephrol* 1996; 7(11): 2414-8.
208. Teschner M, Kosch M, Schaefer RM. Folate metabolism in renal failure. *Nephrol Dial Transplant* 2002; 17 Suppl 5: 24-7.
209. Guttormsen AB, Ueland PM, Svarstad E, Refsum H. Kinetic basis of hyperhomocysteinemia in patients with chronic renal failure. *Kidney Int* 1997; 52(2): 495-502.
210. Ducros V, Demuth K, Sauvant MP, Quillard M, Causse E, Candito M, Read MH, Draï J, Garcia I, Gerhardt MF, et al. Methods for homocysteine analysis and biological relevance of the results. *J Chromatogr B Analyt Technol Biomed Life Sci* 2002; 781(1-2): 207-26.
211. Clarke R, Woodhouse P, Ulvik A, Frost C, Sherliker P, Refsum H, Ueland PM, Khaw KT. Variability and determinants of total homocysteine concentrations in plasma in an elderly population. *Clin Chem* 1998; 44(1): 102-7.
212. Siniscalchi A, Mancuso F, Gallelli L, Ferreri Ibbadu G, Biagio Mercuri N, De Sarro G. Increase in plasma homocysteine levels induced by drug treatments in neurologic patients. *Pharmacol Res* 2005; 52(5): 367-75.
213. Schneede J, Refsum H, Ueland PM. Biological and environmental determinants of plasma homocysteine. *Semin Thromb Hemost* 2000; 26(3): 263-79.

## Online Supporting Material

214. Guttormsen AB, Refsum H, Ueland PM. The interaction between nitrous oxide and cobalamin. Biochemical effects and clinical consequences. *Acta Anaesthesiol Scand* 1994; 38(8): 753-6.
215. Ruscin JM, Page RL, 2nd, Valuck RJ. Vitamin B(12) deficiency associated with histamine(2)-receptor antagonists and a proton-pump inhibitor. *Ann Pharmacother* 2002; 36(5): 812-6.
216. Wolters M, Strohle A, Hahn A. Cobalamin: a critical vitamin in the elderly. *Prev Med* 2004; 39(6): 1256-66.
217. Wile DJ, Toth C. Association of metformin, elevated homocysteine, and methylmalonic acid levels and clinically worsened diabetic peripheral neuropathy. *Diabetes Care* 2010; 33(1): 156-61.
218. Parikh S, Matulis J. Vitamin B12 Deficiency Associated With Metformin. *Endocrinologist* 2010; 20(1): 38-40.
219. Zesiewicz TA, Wecker L, Sullivan KL, Merlin LR, Hauser RA. The controversy concerning plasma homocysteine in Parkinson disease patients treated with levodopa alone or with entacapone: Effects of vitamin status. *Clinical Neuropharmacology* 2006; 29(3): 106-111.
220. Cole DE, Ross HJ, Evrovski J, Langman LJ, Miner SE, Daly PA, Wong PY. Correlation between total homocysteine and cyclosporine concentrations in cardiac transplant recipients. *Clin Chem* 1998; 44(11): 2307-12.
221. Bostom AG, Gohh RY, Beaulieu AJ, Han H, Jacques PF, Selhub J, Dworkin L, Rosenberg IH. Determinants of fasting plasma total homocysteine levels among chronic stable renal transplant recipients. *Transplantation* 1999; 68(2): 257-61.
222. Jacques PF, Bostom AG, Wilson PW, Rich S, Rosenberg IH, Selhub J. Determinants of plasma total homocysteine concentration in the Framingham Offspring cohort. *Am J Clin Nutr* 2001; 73(3): 613-21.
223. Verhoef P, Pasman WJ, Van Vliet T, Urgert R, Katan MB. Contribution of caffeine to the homocysteine-raising effect of coffee: a randomized controlled trial in humans. *Am J Clin Nutr* 2002; 76(6): 1244-8.
224. Olthof MR, Hollman PC, Zock PL, Katan MB. Consumption of high doses of chlorogenic acid, present in coffee, or of black tea increases plasma total homocysteine concentrations in humans. *Am J Clin Nutr* 2001; 73(3): 532-8.
225. Kim DB, Oh YS, Yoo KD, Lee JM, Park CS, Ihm SH, Jang SW, Shim BJ, Kim HY, Seung KB, et al. Passive smoking in never-smokers is associated with increased plasma homocysteine levels. *Int Heart J* 2010; 51(3): 183-7.
226. Nygard O, Vollset SE, Refsum H, Stensvold I, Tverdal A, Nordrehaug JE, Ueland M, Kvale G. Total plasma homocysteine and cardiovascular risk profile. The Hordaland Homocysteine Study. *JAMA* 1995; 274(19): 1526-33.
227. Joubert LM, Manore MM. Exercise, nutrition, and homocysteine. *Int J Sport Nutr Exerc Metab* 2006; 16(4): 341-61.
228. Obeid R, Kirsch SH, Kasoha M, Eckert R, Herrmann W. Concentrations of unmetabolized folic acid and primary folate forms in plasma after folic acid treatment in older adults. *Metabolism* 2011; 60(5): 673-80.
229. Kelly P, McPartlin J, Goggins M, Weir DG, Scott JM. Unmetabolized folic acid in serum: acute studies in subjects consuming fortified food and supplements. *Am J Clin Nutr* 1997; 65(6): 1790-5.
230. Gregory JF, 3rd, Williamson J, Bailey LB, Toth JP. Urinary excretion of [2H4]folate by nonpregnant women following a single oral dose of [2H4]folic acid is a functional index of folate nutritional status. *Journal of Nutrition* 1998; 128(11): 1907-12.
231. Guinotte CL, Burns MG, Axume JA, Hata H, Urrutia TF, Alamilla A, McCabe D, Singgih A, Cogger EA, Caudill MA. Methylenetetrahydrofolate reductase 677C-->T variant modulates folate status response to controlled folate intakes in young women. *J Nutr* 2003; 133(5): 1272-80.



## Online Supporting Material

232. Fukuwatari T, Shibata K. Urinary water-soluble vitamins and their metabolite contents as nutritional markers for evaluating vitamin intakes in young Japanese women. *J Nutr Sci Vitaminol (Tokyo)* 2008; 54(3): 223-9.
233. Gregory JF, 3rd. Case study: folate bioavailability. *J Nutr* 2001; 131(4 Suppl): 1376S-82S.
234. Caudill MA, Cruz AC, Gregory JF, Hutson AD, Bailey LB. Folate status response to controlled folate intake in pregnant women. *J Nutr* 1997; 127(12): 2363-2370.
235. Wolfe JM, Bailey LB, Herrlinger-Garcia K, Theriaque DW, Gregory JF, 3rd, Kauwell GP. Folate catabolite excretion is responsive to changes in dietary folate intake in elderly women. *Am J Clin Nutr* 2003; 77(4): 919-23.
236. Caudill MA, Bailey LB, Gregory JF, 3rd. Consumption of the folate breakdown product para-aminobenzoylglutamate contributes minimally to urinary folate catabolite excretion in humans: investigation using [(13)C(5)]para-aminobenzoylglutamate. *J Nutr* 2002; 132(9): 2613-6.
237. McPartlin J, Courtney G, McNulty H, Weir D, Scott J. The quantitative analysis of endogenous folate catabolites in human urine. *Anal Biochem* 1992; 206(2): 256-61.
238. Gregory JF, 3rd, Swendseid ME, Jacob RA. Urinary excretion of folate catabolites responds to changes in folate intake more slowly than plasma folate and homocysteine concentrations and lymphocyte DNA methylation in postmenopausal women. *J Nutr* 2000; 130(12): 2949-52.
239. Kownacki-Brown PA, Wang C, Bailey LB, Toth JP, Gregory JF, 3rd. Urinary excretion of deuterium-labeled folate and the metabolite p-aminobenzoylglutamate in humans. *J Nutr* 1993; 123(6): 1101-8.
240. Higgins JR, Quinlivan EP, McPartlin J, Scott JM, Weir DG, Darling MR. The relationship between increased folate catabolism and the increased requirement for folate in pregnancy. *BJOG* 2000; 107(9): 1149-54.
241. Caudill MA, Gregory JF, Hutson AD, Bailey LB. Folate catabolism in pregnant and nonpregnant women with controlled folate intakes. *J Nutr* 1998; 128(2): 204-8.
242. Gregory JF, 3rd, Caudill MA, Opalko FJ, Bailey LB. Kinetics of folate turnover in pregnant women (second trimester) and nonpregnant controls during folic acid supplementation: stable-isotopic labeling of plasma folate, urinary folate and folate catabolites shows subtle effects of pregnancy on turnover of folate pools. *J Nutr* 2001; 131(7): 1928-37.
243. Suh JR, Oppenheim EW, Girgis S, Stover PJ. Purification and properties of a folate-catabolizing enzyme. *J Biol Chem* 2000; 275(45): 35646-55.
